# Supplementary material for: Virome heterogeneity and connectivity in waterfowl and shorebird communities
Source: PubMed Central journal article supplement (PMC6775988; doi:10.1038/s41396-019-0458-0), 2019-06-25
Supplement: 41396_2019_458_MOESM1_ESM.pdf [file 41396_2019_458_MOESM1_ESM.pdf]

# Virome heterogeneity and connectivity in waterfowl and shorebird communities

Michelle Wille, Mang Shi, Marcel Klaassen, Aeron C. Hurt, Edward C. Holmes

## Contents

|                                                                                                                                                          |    |
|----------------------------------------------------------------------------------------------------------------------------------------------------------|----|
| Supplemental Methods.....                                                                                                                                | 3  |
| <b>Table S1.</b> Metadata for each library in this study .....                                                                                           | 6  |
| <b>Table S2.</b> Sequence alignment lengths for phylogenetic analysis .....                                                                              | 7  |
| <b>Table S3.</b> Viruses (>1000bp) identified in this study.....                                                                                         | 8  |
| <b>Figure S1.</b> Correlation of laboratory and sequencing metrics .....                                                                                 | 10 |
| <b>Figure S2.</b> Schematic overview of novel viruses revealed in this study .....                                                                       | 11 |
| <b>Figure S3.</b> Phylogenetic tree of the ORF1ab, including the RdRp, of Avastroviruses.....                                                            | 12 |
| <b>Figure S4.</b> Partial RdRp phylogeny of members of the Avastroviruses .....                                                                          | 13 |
| <b>Figure S5.</b> Phylogeny of the polyprotein, containing the RdRp, of select members of the <i>Picornaviridae</i> .....                                | 14 |
| <b>Figure S6.</b> Phylogeny of the polyprotein, containing the RdRp, of select members of the Megriviruses .....                                         | 15 |
| <b>Figure S7.</b> Phylogenetic tree of the VP1, containing the RdRp, of the rotaviruses.....                                                             | 16 |
| <b>Figure S8.</b> Phylogenetic tree of the P protein of avian hepatitis B viruses .....                                                                  | 17 |
| <b>Figure S9.</b> Phylogenetic tree of the ORF1ab, containing the RdRp, of the <i>Coronaviridae</i> ...                                                  | 18 |
| <b>Figure S10.</b> Phylogeny of the partial RdRp of gammacoronaviruses.....                                                                              | 19 |
| <b>Figure S11.</b> Phylogeny of the partial RdRp of deltacoronaviruses.....                                                                              | 20 |
| <b>Figure S12.</b> Phylogenies of the HA genes of H9 and H3 influenza A viruses containing all wild bird sequences.....                                  | 21 |
| <b>Figure S13.</b> Phylogenies of the NA and NP genes of influenza A viruses, containing all wild bird sequences.....                                    | 22 |
| <b>Figure S14.</b> Phylogeny of the F gene of avian avulavirus Type 1 Class II Genotype 1 .....                                                          | 23 |
| <b>Figure S15.</b> Abundance of avian viral families identified in each library .....                                                                    | 24 |
| <b>Figure S16.</b> Alpha diversity of avian viral families identified in each library .....                                                              | 25 |
| <b>Figure S17.</b> Alpha diversity of avian viral genera identified in each library .....                                                                | 26 |
| <b>Figure S18.</b> Alpha diversity of avian viral species characterised in this study .....                                                              | 27 |
| <b>Figure S19.</b> Non-metric multidimensional scaling (NMDS) plot applying the bray curtis dissimilarity matrix for viral abundance and diversity ..... | 28 |
| <b>Figure S20.</b> Effect of IAV on Alpha Diversity of Anseriiform viromes.....                                                                          | 29 |
| <b>Figure S21.</b> Effect of coronavirus on alpha diversity of Anseriiform viromes .....                                                                 | 30 |

|                                                                                                                                                         |    |
|---------------------------------------------------------------------------------------------------------------------------------------------------------|----|
| <b>Figure S22.</b> Differential abundance of viral families in libraries from Anseriiformes and Charadriiformes .....                                   | 31 |
| <b>Figure S23.</b> Differential abundance of viral genera in the family <i>Picornaviridae</i> in libraries from Anseriiformes and Charadriiformes ..... | 32 |
| <b>Figure S24.</b> Differential abundance (log 2 fold change) of viruses .....                                                                          | 33 |
| <b>Figure S25.</b> Co-phylogeny demonstrating a discordance between host phylogenetic relationships and virome composition .....                        | 34 |
| <b>Figure S26.</b> Co-phylogeny demonstrating the discordance between host phylogenetic relationships and virome composition .....                      | 35 |

## Supplemental Methods

### Sample selection

Samples were collected as part of a long-term IAV surveillance study (1, 2). A combination of oropharyngeal and cloacal samples were collected using a sterile-tipped swab and were placed in viral transport media (VTM, Brain-heart infusion broth containing 2x10<sup>6</sup> U/l penicillin, 0.2 mg/ml streptomycin, 0.5 mg/ml gentamicin, 500 U/ml amphotericin B, Sigma). Samples were kept cool immediately following collection (4-12C), and subsequently placed at -80C for long-term storage.

### RNA virus discovery

We selected 10-15 samples per species for RNA extraction. RNA was extracted and libraries constructed as per (3). Briefly, RNA was extracted from swab samples using the MagMax mirVana™ Total RNA Isolation Kit (Thermo Fisher Scientific) on the KingFisher™ Flex Purification System (Thermo Fisher Scientific). Ten samples with the highest concentration were pooled (based upon species) using equal concentrations using the RNeasy MinElute Cleanup Kit (Qiagen). Libraries were constructed using the TruSeq total RNA library preparation protocol (Illumina), and host rRNA was removed using the Ribo-Zero Gold Kit (Illumina). Paired end sequencing (100bp) of the RNA library was performed on an Illumina HiSeq 2500 platform at the Australian Genome Research Facility (AGRF, Melbourne).

We used the bioinformatics pipeline reported in (3-5). Accordingly, sequence reads were demultiplexed and trimmed with Trimmomatic, and contigs were *de novo* assembled using Trinity (6). No filtering of host/bacterial reads was performed before assembly. All assembled contigs were compared to the entire nonredundant nucleotide (nt) and protein (nr) database using blastn and diamond blast (7), respectively, setting an e-value threshold of  $1 \times 10^{-10}$  to remove potential false positives. Abundance estimates for all contigs were determined using the RSEM algorithm implemented in Trinity.

RNA sequencing of rRNA depleted libraries resulted in an average of 50,906,440 reads (range 44,178,936-64,149,180) assembled into a mean of 27,108 contigs (range 22,175-496,319) (Table S1). There was no significant correlation between RNA concentration and the number of reads, contigs or abundance demonstrating such that this was not a source of bias (Fig S1).

## **Virus genome annotation and phylogenetic analysis**

Contigs were annotated, and phylogenetic trees inferred as per (3). Briefly, contigs greater than 1000bp in length were inspected using Geneious R10 (Biomatters, New Zealand), and open reading frames corresponding to predicted genome architectures based on the closest reference genomes were interrogated. Reads were subsequently mapped back to viral contigs to identify mis-assembly using bowtie2 (8). Viruses with full length genomes, or incomplete genomes that possess the full-length RNA-dependant RNA polymerase (RdRp) gene, were used for phylogenetic analysis. Sequences of the polyprotein or gene encoding for the RdRp were aligned using MAFFT (9), and gaps and ambiguously aligned regions were stripped using trimAL (10). Final alignment lengths for each data set are presented in Table S2. The most appropriate amino acid substitution model was then determined for each data set, and maximum likelihood trees were estimated using PhyML 3.0 (11) with 1000 bootstrap replicates. Novel viral species were identified as those that had <90% RdRp protein identity, or <80% genome identity to previously described viruses.

## **Diversity and abundance across libraries**

We used diversity metrics commonly used in microbial community ecology to understand composition and the factors that may drive variation in the composition of avian viromes. The alpha-diversity and beta-diversity indices are measures of within- and between-sample diversity, respectively, and have been associated with various ecological traits and biological phenotypes since the first influential human or environmental metagenomics studies (e.g. (12, 13). Although often associated with microbiome research, they have also been employed in viral ecology (e.g. (14-16), and we extend their use here.

## **References**

1. Ferenczi M. Avian influenza virus dynamics in Australian wild birds. PhD Thesis: Deakin University; 2016.
2. Ferenczi M, Beckmann C, Warner S, Loyn R, O'Riley K, Wang X, et al. Avian influenza infection dynamics under variable climatic conditions, viral prevalence is rainfall driven in waterfowl from temperate, south-east Australia. *Vet Res.* 2016;47:23.
3. Wille M, Eden JS, Shi M, Klaassen M, Hurt AC, Holmes EC. Virus-virus interactions and host ecology are associated with RNA virome structure in wild birds. *Mol Ecol.* 2018;doi: 10.1111/mec.14918.
4. Shi M, Lin XD, Chen X, Tian JH, Chen LJ, Li K, et al. The evolutionary history of vertebrate RNA viruses. *Nature.* 2018;556(7700):197-202.
5. Shi M, Lin XD, Tian JH, Chen LJ, Chen X, Li CX, et al. Redefining the invertebrate RNA virosphere. *Nature.* 2016;540(7634):539-43.

6. Grabherr MG, Haas BJ, Yassour M, Levin JZ, Thompson DA, Amit I, et al. Full-length transcriptome assembly from RNA-Seq data without a reference genome. *Nature Biotech.* 2011;29(7):644-52.
7. Buchfink B, Xie C, Huson DH. Fast and sensitive protein alignment using DIAMOND. *Nat Methods.* 2015;12(1):59-60.
8. Langmead B, Salzberg SL. Fast gapped-read alignment with Bowtie 2. *Nat Methods.* 2012;9(4):357-U54.
9. Katoh K, Standley DM. MAFFT multiple sequence alignment software version 7: improvements in performance and usability. *Mol Biol Evol.* 2013;30(4):772-80.
10. Capella-Gutierrez S, Silla-Martinez JM, Gabaldon T. trimAl: a tool for automated alignment trimming in large-scale phylogenetic analyses. *Bioinformatics.* 2009;25(15):1972-3.
11. Guindon S, Dufayard JF, Lefort V, Anisimova M, Hordijk W, Gascuel O. New algorithms and methods to estimate maximum-likelihood phylogenies: assessing the performance of PhyML 3.0. *Systematic biology.* 2010;59(3):307-21.
12. Huttenhower C, Gevers D, Knight R, Abubucker S, Badger JH, Chinwalla AT, et al. Structure, function and diversity of the healthy human microbiome. *Nature.* 2012;486(7402):207-14.
13. Fierer N, Leff JW, Adams BJ, Nielsen UN, Bates ST, Lauber CL, et al. Cross-biome metagenomic analyses of soil microbial communities and their functional attributes. *Proc Natl Acad Sci U S A.* 2012;109(52):21390-5.
14. McCann A, Ryan FJ, Stockdale SR, Dalmasso M, Blake T, Ryan CA, et al. Viromes of one year old infants reveal the impact of birth mode on microbiome diversity. *Peerj.* 2018;6.
15. Roux S, Emerson JB, Eloë-Fadrosh EA, Sullivan MB. Benchmarking viromics: an in silico evaluation of metagenome-enabled estimates of viral community composition and diversity. *Peerj.* 2017;5.
16. Hannigan GD, Meisel JS, Tyldsley AS, Zheng Q, Hodkinson BP, SanMiguel AJ, et al. The Human Skin Double-Stranded DNA Virome: Topographical and Temporal Diversity, Genetic Enrichment, and Dynamic Associations with the Host Microbiome. *mBio.* 2015;6(5).

**Table S1. Metadata for each library in this study.**

| Host Taxonomy                           | Species                | Scientific Name                    | Bird capture/collection method | Sample location, date                  | RNA conc (pg/ul) | No. Paired Reads | No. Contigs | Total Viral Abundance | Avian Viral Abundance |
|-----------------------------------------|------------------------|------------------------------------|--------------------------------|----------------------------------------|------------------|------------------|-------------|-----------------------|-----------------------|
| Charadriiformes, Scolopacidae           | Red-necked Stint       | <i>Calidris ruficollis</i>         | Cannon netting                 | Western Treatment Plant, December 2012 | 10300            | 25,007,631       | 95246       | 5.89                  | 8.48e-02              |
| Charadriiformes, Scolopacidae           | Curlew Sandpiper       | <i>Calidris ferruginea</i>         | Cannon netting                 | Western Treatment Plant, December 2012 | 10300            | 32,074,590       | 22175       | 0.15                  | 1.84e-04              |
| Charadriiformes, Scolopacidae s         | Sharp-tailed Sandpiper | <i>Calidris acuminata</i>          | Cannon netting                 | Western Treatment Plant, December 2012 | 4700             | 31,690,395       | 40843       | 0.37                  | 8.46e-02              |
| Charadriiformes, Charadriidae           | Red-capped Plover      | <i>Charadrius ruficapillus</i>     | Cannon netting                 | Western Treatment Plant, December 2012 | 9000             | 26,073,463       | 95577       | 3.20                  | 2.301e-02             |
| Anseriiformes, Antidae, Anatinae        | Pacific Black Duck     | <i>Anas superciliosa</i>           | Hunter shot                    | SW Victoria, March/April 2017          | 38700            | 24,873,979       | 496319      | 0.47                  | 1.98e-03              |
| Anseriiformes, Antidae, Anatinae        | Grey Teal              | <i>Anas gracilis</i>               | Hunter shot                    | SW Victoria, March/April 2017          | 16500            | 22,984,396       | 435173      | 0.97                  | 5.078e-02             |
| Anseriiformes, Antidae, Tadorninae      | Australian Shelduck    | <i>Tadorna tadornoides</i>         | Hunter shot                    | SW Victoria, March/April 2017          | 14900            | 22,089,468       | 540006      | 0.21                  | 3.54e-02              |
| Anseriiformes, Antidae, UR <sup>1</sup> | Australian Wood Duck   | <i>Chenonetta jubata</i>           | Hunter shot                    | SW Victoria, March/April 2017          | 30400            | 22,142,942       | 531670      | 0.39                  | 2.45e-03              |
| Anseriiformes, Antidae, UR              | Pink-eared duck        | <i>Malacorhynchus membranaceus</i> | Hunter shot                    | SW Victoria, March/April 2017          | 30600            | 22,142,051       | 209969      | 10.67                 | 4.72e-02              |

1. UR: Unresolved Subfamily. Australian Wood Ducks are occasionally placed in subfamily Anatinae or Tadorninae. Pink-eared Ducks are occasionally placed in subfamily Tadorninae, Oxyurinae, or Dendrocheninae.

**Table S2. Sequence alignment lengths for phylogenetic analysis**

| <b>Group</b> | <b>Taxonomy level</b>                                 | <b>Gene</b>                           | <b>Nucleotide or amino acid</b> | <b>Alignment length</b> | <b>Alignment length following trimAL</b> |
|--------------|-------------------------------------------------------|---------------------------------------|---------------------------------|-------------------------|------------------------------------------|
| ssRNA        | <i>Astroviridae</i> , Avastrovirus                    | ORF1ab (includes RdRp)                | Amino acid                      | 2029 aa                 | 1449 aa                                  |
| ssRNA        | <i>Astroviridae</i> , Avastrovirus                    | partial ORF1ab (includes RdRp)        | Nucleotide                      | 398 bp                  |                                          |
| ssRNA        | <i>Coronaviridae</i>                                  | ORF1ab (includes RdRp)                | Amino acid                      | 10805 aa                | 6824 aa                                  |
| ssRNA        | <i>Coronaviridae</i> , gammacoronavirus               | partial ORF1ab (includes RdRp)        | Nucleotide                      | 290bp                   |                                          |
| ssRNA        | <i>Coronaviridae</i> , deltacoronavirus               | partial ORF1ab (includes RdRp)        | Nucleotide                      | 290bp                   |                                          |
| ssRNA        | <i>Calciviridae</i>                                   | Polyprotein (includes RdRp)           | Amino acid                      | 3836 aa                 | 2401 aa                                  |
| dsRNA        | <i>Picorbirnaviridae</i>                              | Segment 2 (includes RdRp)             | Amino acid                      | 1071 aa                 | 527 aa                                   |
| ssRNA        | <i>Picornaviridae</i>                                 | Polyprotein (includes RdRp)           | Amino acid                      | 5820 aa                 | 2546 aa                                  |
| ssRNA        | <i>Orthomyxoviridae</i> , Influenza A virus           | HA                                    | Nucleotide                      | 1734 bp                 |                                          |
| ssRNA        | <i>Orthomyxoviridae</i> , Influenza A virus           | NA                                    | Nucleotide                      | 1446 bp                 |                                          |
| ssRNA        | <i>Orthomyxoviridae</i> , Influenza A virus           | NP                                    | Nucleotide                      | 1580 bp                 |                                          |
| ssRNA        | <i>Paramyxoviridae</i> , Avian avulavirus 1, class II | F gene                                | Nucleotide                      | 1662bp                  |                                          |
| dsRNA        | <i>Reoviridae</i> , Rotavirus                         | VP1 (includes RdRp)                   | Amino acid                      | 1198 aa                 |                                          |
| DNA          | <i>Hepadnaviridae</i> , <i>Avihepandavirus?</i>       | DNA directed DNA polymerase P protein | Amino acid                      | 484 aa                  | 401 aa                                   |

**Table S3. Viruses (>1000bp) identified in this study.**

| Host Species           | Viral Family     | Viral Genus      | Virus Species                              | New species | Complete?                | No. Reads Mapped | Closest Blastx hit                                                                        | pident (Blastx) | e-value   |
|------------------------|------------------|------------------|--------------------------------------------|-------------|--------------------------|------------------|-------------------------------------------------------------------------------------------|-----------------|-----------|
| Red-necked Stint       | Paramyxoviridae  | Avulavirus       | Avian avulavirus 1                         | No          | Yes                      | 178000           | AFU34346.1 polymerase [Avian avulavirus 1]                                                | 99              | 0         |
| Red-necked Stint       | Picornaviridae   | Unassigned       | Red-necked Stint Picornavirus B-like       | Yes         | Yes                      | 9287             | YP_004564600.1 polyprotein [Pigeon picornavirus B]                                        | 45.7            | 0         |
| Red-necked Stint       | Astroviridae     | Avastrovirus     | Red-necked Stint Astrovirus Group 4        | Yes         | Yes                      | 6302             | CAB95006.3 nonstructural protein; putative RNA-dependant RNA polymerase [Avastrovirus 1]  | 53              | 7.40E-157 |
| Red-necked Stint       | Picornaviridae   | Gallivirus       | Red-necked stint Gallivirus                | Yes         | Capsid, RdRp             | 6523             | ADL38958.1 polyprotein [Passerivirus A1]                                                  | 32.5            | 3.00E-141 |
| Sharp-tailed Sandpiper | Coronaviridae    | Deltacoronavirus | Deltacoronavirus                           | Yes         | ORF1ab                   | 43518            | YP_005352837.1 orf1ab gene product [White-eye coronavirus HKU16]                          | 73.1            | 0         |
| Sharp-tailed Sandpiper | Picornaviridae   | Unassigned       | Sharp-tailed Sandpiper Picornavirus B-like | Yes         | sort of                  | 7269             | YP_004564600.1 polyprotein [Pigeon picornavirus B]                                        | 58.7            | 1.10E-186 |
| Red-capped Plover      | Picornaviridae   | Megrivirus       | Sharp-tailed Sandpiper Megrivirus          | Yes         | Yes                      | 9107             | YP_009345890.1 polyprotein [Goose megrivirus]                                             | 48.3            | 0         |
| Pacific Black Duck     | Picornaviridae   | Megrivirus       | Pacific Black Duck Megrivirus              | Yes         | sort of                  | 671              | YP_009030047.1 polyprotein [Duck megrivirus]                                              | 84.2            | 1.00E-271 |
| Grey Teal              | Coronaviridae    | Gammacoronavirus | Gammacoronavirus                           | No          | no                       | 8089             | AKF17723.1 ORF1a [Duck coronavirus]                                                       | 79.5            | 0         |
| Grey Teal              | Caliciviridae    | Unassigned       | Grey Teal Calicivirus                      | Yes         | Yes                      | 2082             | AFH89833.1 polyprotein [Turkey calicivirus]                                               | 42              | 0         |
| Grey Teal              | Orthomyxoviridae | Influenza A      | Influenza A                                | H9N1        | Yes                      | 1416             | ACZ15987.1 hemagglutinin [Influenza A virus (A/mallard/Switzerland/WV1070805/2007(H9N2))] | 98.2            | 0         |
| Grey Teal              | Picobirnaviridae | Picobirnavirus   | Grey Teal Picobirnavirus A                 | Yes         | Segment 1 only           | 340              | AGK45547.1 hypothetical protein; partial [Fox picobirnavirus]                             | 37.2            | 1.70E-64  |
| Grey Teal              | Picobirnaviridae | Picobirnavirus   | Grey Teal Picobirnavirus B                 | Yes         | 2 segments, both partial | 420              | ALL29321.1 RNA-dependent RNA polymerase [Human picobirnavirus]                            | 64.7            | 7.40E-195 |
| Grey Teal              | Picobirnaviridae | Picobirnavirus   | Grey Teal Picobirnavirus C                 | Yes         | 2 segments, both partial | 164              | AMP18960.1 RNA-dependent RNA polymerase [Otarine picobirnavirus]                          | 74.6            | 2.60E-127 |
| Grey Teal              | Reoviridae       | Rotavirus        | Grey Teal Rotavirus F-like                 | Yes         | partial VP1              | 858              | AIW53371.1 VP1; partial [Rotavirus F]                                                     | 70.4            | 8.20E-28  |
| Grey Teal              | Reoviridae       | Rotavirus        | Duck Rotavirus G-like                      | Yes         | partial VP1              | 1474             | YP_008136242.1 VP1 [Rotavirus G chicken/03V0567/DEU/2003]                                 | 62              | 3.20E-21  |
| Australian Shelduck    | Picornaviridae   | Unassigned       | Australian Shelduck Sapelovirus-like       | Yes         | No                       | 360              | YP_164335.1 polyprotein [Avian sapelovirus]                                               | 47.8            | 0         |
| Australian Shelduck    | Coronaviridae    | Gammacoronavirus | Gammacoronavirus                           | No          | Yes                      | 13176            | AKF17722.1 ORF1ab polyprotein [Duck coronavirus]                                          | 83.2            | 0         |
| Australian Shelduck    | Parvoviridae     | Parvovirus       | Australian Shelduck Parvovirus             | Yes         | No                       | 341              | ANY57893.1 non-structural protein 1 [Rat parvovirus 2]                                    | 62.5            | 1.20E-40  |



|                    |                      |                     |                                       |      |             |      |                                                                                                         |      |               |
|--------------------|----------------------|---------------------|---------------------------------------|------|-------------|------|---------------------------------------------------------------------------------------------------------|------|---------------|
| Wood Duck          | Hepadavi<br>ridae    | Avidepadn<br>avirus | Wood Duck Picornavirus                | Yes  | No          | 389  | ADP55745.1 large S protein [Duck hepatitis B virus]                                                     | 88.2 | 1.60E-<br>173 |
| Pink-eared<br>Duck | Astrovirid<br>ae     | Avastrovir<br>us    | Pink-eared Duck<br>Astrovirus Group 2 | Yes  | No          | 87   | AID55205.1 non-structural polyprotein [Duck astrovirus CPH]                                             | 61.8 | 2.80E-<br>44  |
| Pink-eared<br>Duck | Calicivirid<br>ae    | Unassigned          | Pink-eared Duck<br>Calicivirus A      | Yes  | Yes         | 6592 | YP_009028574.1 polyprotein [Goose calicivirus]                                                          | 67.3 | 0             |
| Pink-eared<br>Duck | Calicivirid<br>ae    | Unassigned          | Pink-eared Duck<br>Calicivirus B      | Yes  | No          | 747  | YP_009028574.1 polyprotein [Goose calicivirus]                                                          | 45.6 | 3.30E-<br>154 |
| Pink-eared<br>Duck | Picornavir<br>idae   | Megrivirus          | Pink-eared Duck<br>Megrivirus         | yes  | Yes         | 3658 | YP_009030047.1 polyprotein [Duck megrivirus]                                                            | 68   | 0             |
| Pink-eared<br>Duck | Picobirnav<br>iridae | Picobirnavi<br>rus  | Pink-eared Duck<br>Picobirnavirus     | Yes  | Yes         | 1742 | AGK45545.1 RNA-dependent RNA polymerase; partial [Fox<br>picobirnavirus]                                | 78   | 3.40E-<br>264 |
| Pink-eared<br>Duck | Picornavir<br>idae   | Sapelovirus         | Pink-eared Duck<br>Picornavirus       | Yes  | Yes         | 2181 | YP_164335.1 polyprotein [Avian sapelovirus]                                                             | 36.9 | 0             |
| Pink-eared<br>Duck | Reoviridae           | Rotavirus           | Duck Rotavirus G-like                 | Yes  | partial VP1 | 2791 | AGW95854.1 VP1 [Rotavirus G pigeon/HK18]                                                                | 65.1 | 5.90E-<br>61  |
| Pink-eared<br>Duck | Orthomyx<br>oviridae | Influenza<br>A      | Influenza A                           | H3N1 | mostly      | 536  | ADU17311.1 hemagglutinin [Influenza A virus (A/northern<br>pintail/Interior Alaska/8BM3582/2008(H3N8))] | 97.7 | 1.40E-<br>42  |

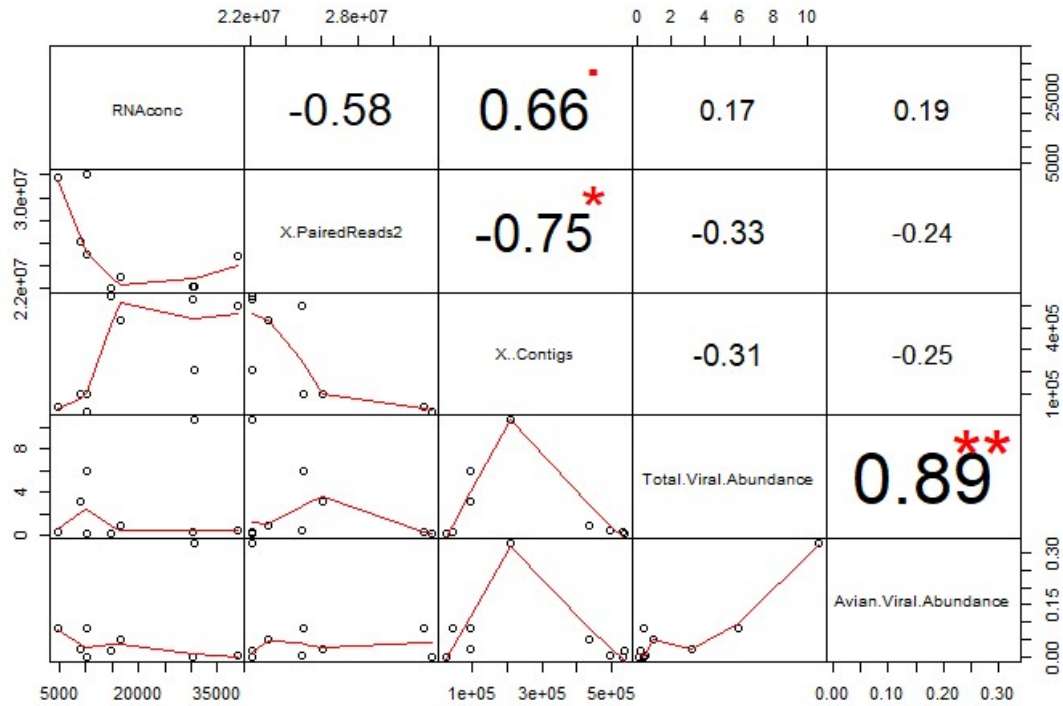

**Figure S1. Correlation of laboratory and sequencing metrics.** Correlation between pooled sample RNA concentration, number of paired reads generated, number of contigs, total viral abundance and avian viral abundances. Where there are significant correlations between total viral abundance and avian viral abundances, and the number of paired reads and number of contigs generated, there is no statistically significant correlation (presented as asterisks) between starting RNA concentration and any sequencing metric. Metrics used are presented in Table S1.

dsRNA viruses

Reoviridae, Rotavirus

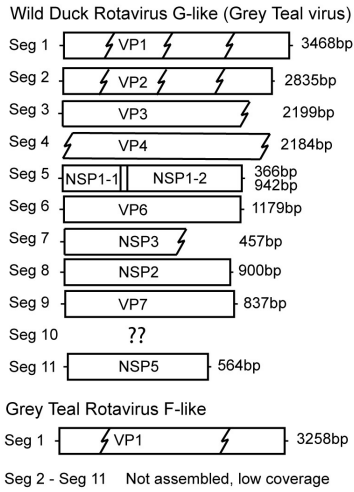

Picobirnaviridae, Picobirnavirus

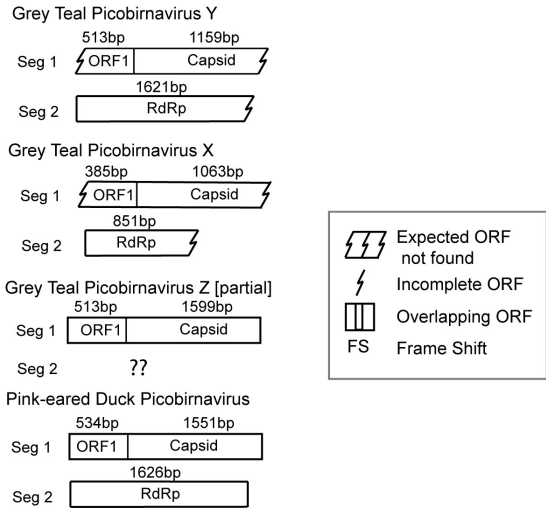

(+) ssRNA viruses

Astroviridae, Avastrovirus

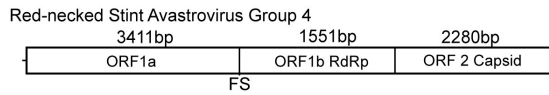

Caliciviridae, Unassigned Avian

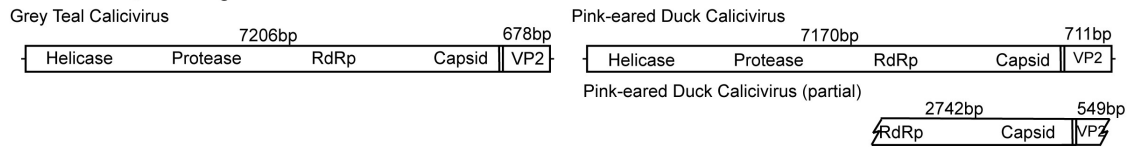

Picornaviridae, Megrivirus

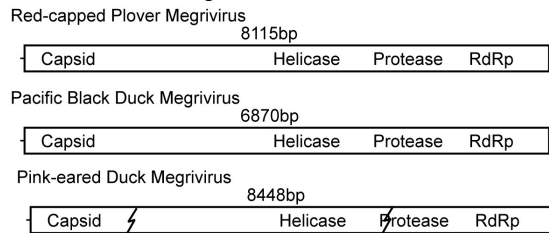

Picornaviridae, Unassigned

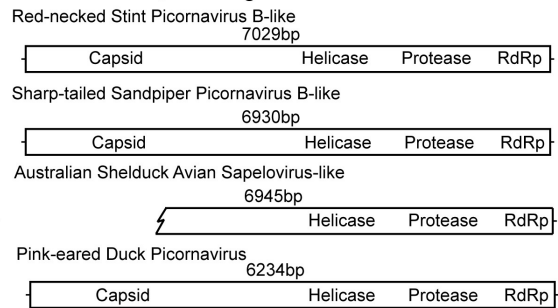

Picornaviridae, Galiivirus

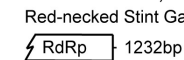

DNA viruses

Parvoviridae, Chapparovirus

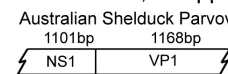

Hepadnaviridae, Hepatitis B virus

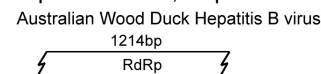

Figure S2. Schematic overview of novel viruses revealed in this study.

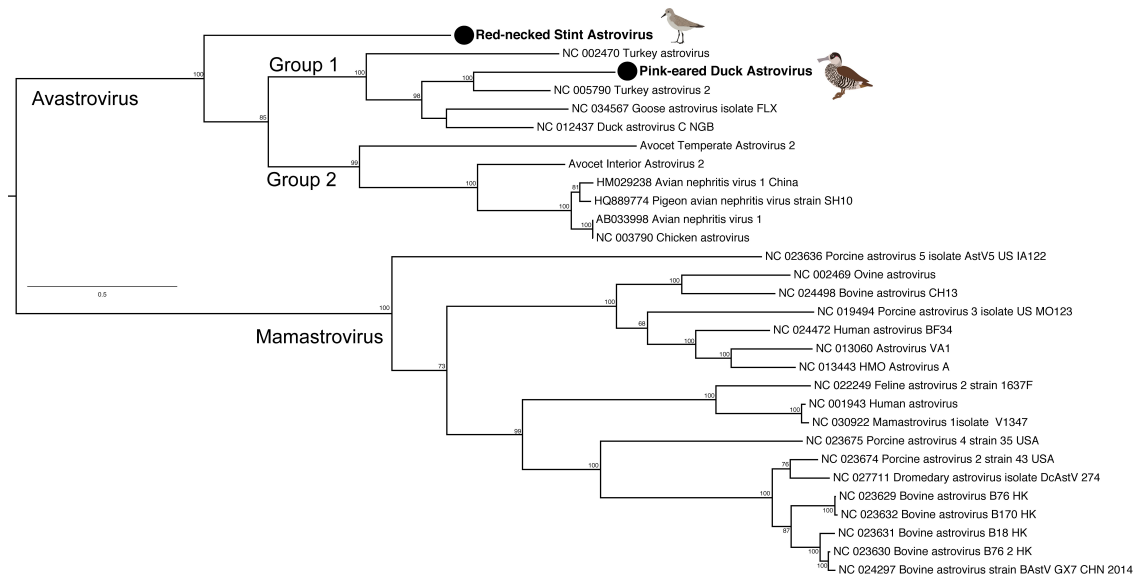

**Figure S3. Phylogenetic tree of the ORF1ab, including the RdRp, of Avastroviruses.** Viruses identified in this study are denoted with a filled circle and in bold. Pink-eared Duck Astrovirus is a Group 2 virus, Red-necked Stint Astrovirus appears to be a new Group, intermediate between Group 1-2 and Group 3 (as in Figure S4). Group 3 is not shown as there are no full genomes available, but is presented in Figure S4. The tree is mid-point rooted for clarity only. Bootstrap values >70% are shown for key nodes. The scale bar represents the number of amino acid substitutions per site.

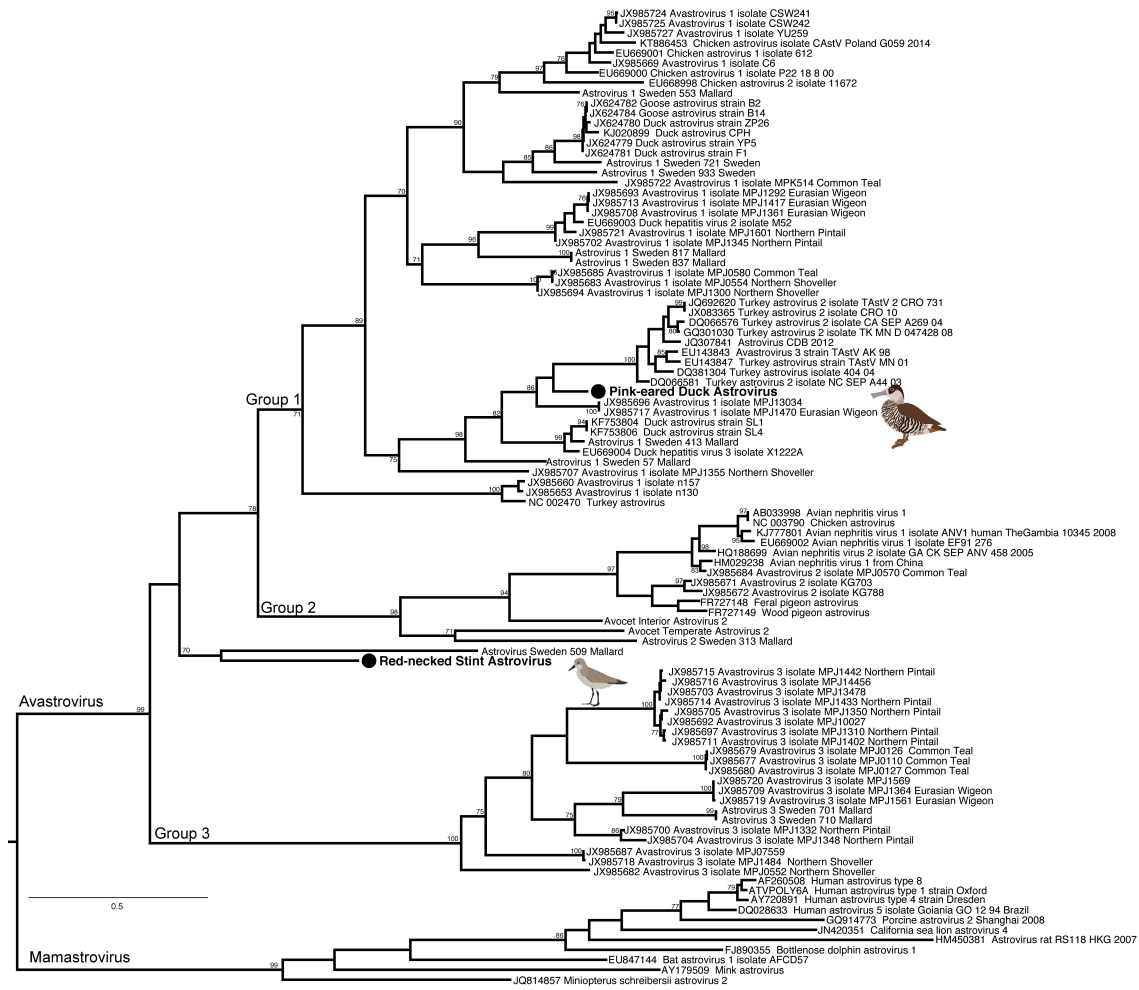

**Figure S4. Partial RdRp phylogeny of members of the Avastroviruses.** Red-necked Stint Astrovirus, a sister-group to an astrovirus identified in a Swedish Mallard potentially represent a new Group of Astroviruses. The tree is rooted between the avian and mammalian astroviruses. The scale bar indicates the number of nucleotide substitutions per site. Viruses described in this study are marked in bold, adjacent to a filled circle. Bootstrap values >70% are shown for key nodes. The scale bar indicates the number of amino acid substitutions per site. The phylogeny of the full length polyprotein is presented in Figure S2.

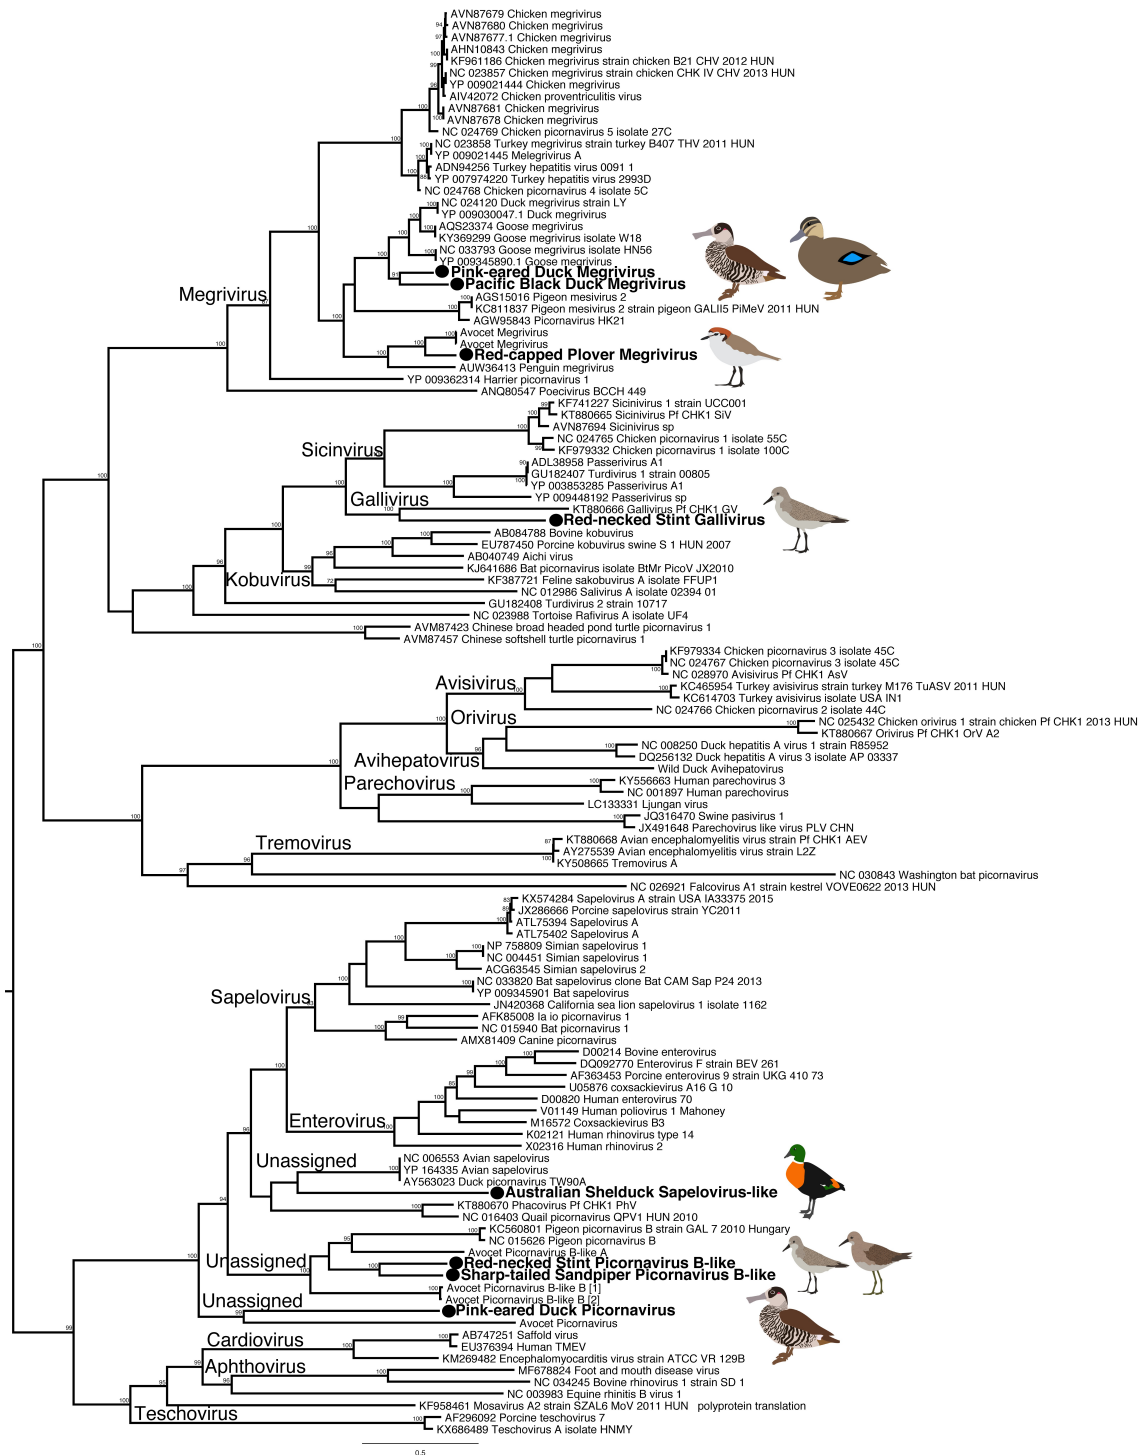

**Figure S5. Phylogeny of the polyprotein, containing the RdRp, of select members of the *Picornaviridae*.** Reference viruses are those from Boros et al. (2016). The tree was midpoint rooted for clarity only. Viruses described in this study are marked in bold, adjacent to a filled circle. Bootstrap values >70% are shown for key nodes. The scale bar indicates the number of amino acid substitutions per site.

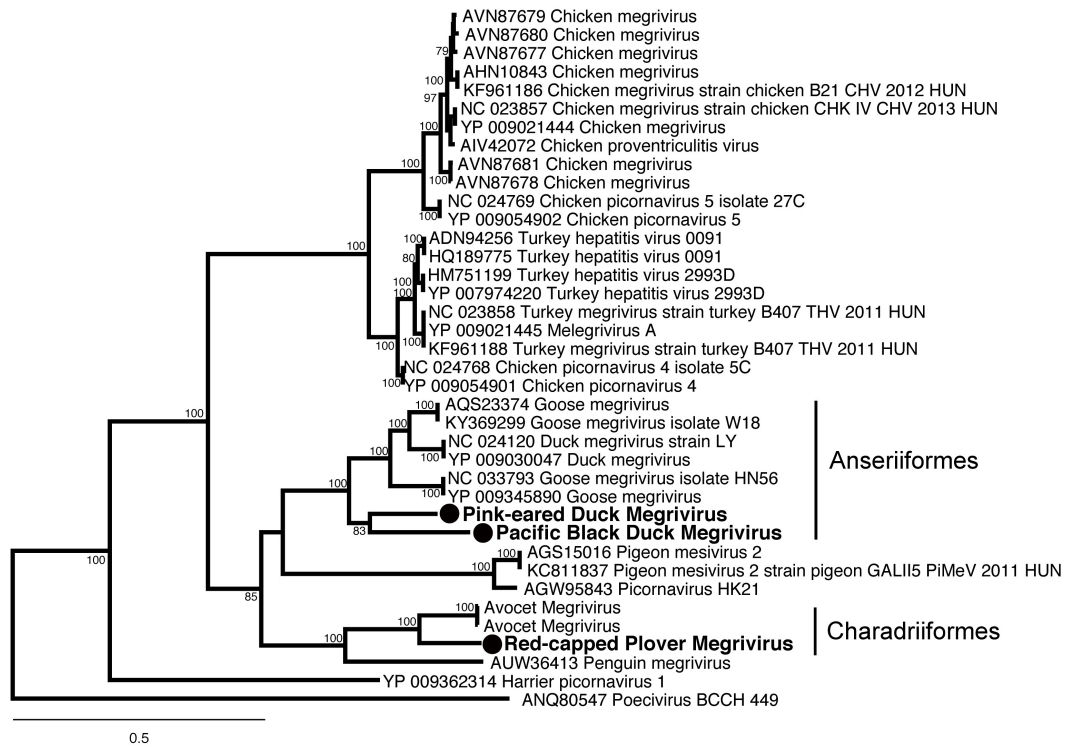

**Figure S6. Phylogeny of the polyprotein, containing the RdRp, of select members of the Megriviruses.** Poecivirus was set as the outgroup. Viruses described in this study are marked in bold, adjacent to a filled circle. Bootstrap values >70% are shown for key nodes. The scale bar indicates the number of amino acid substitutions per site. Broadly, there is a trend for viral species isolated from Chickens, Turkeys, Pigeons, Anseriiformes and Charadriiformes to form independent, monophyletic groups.

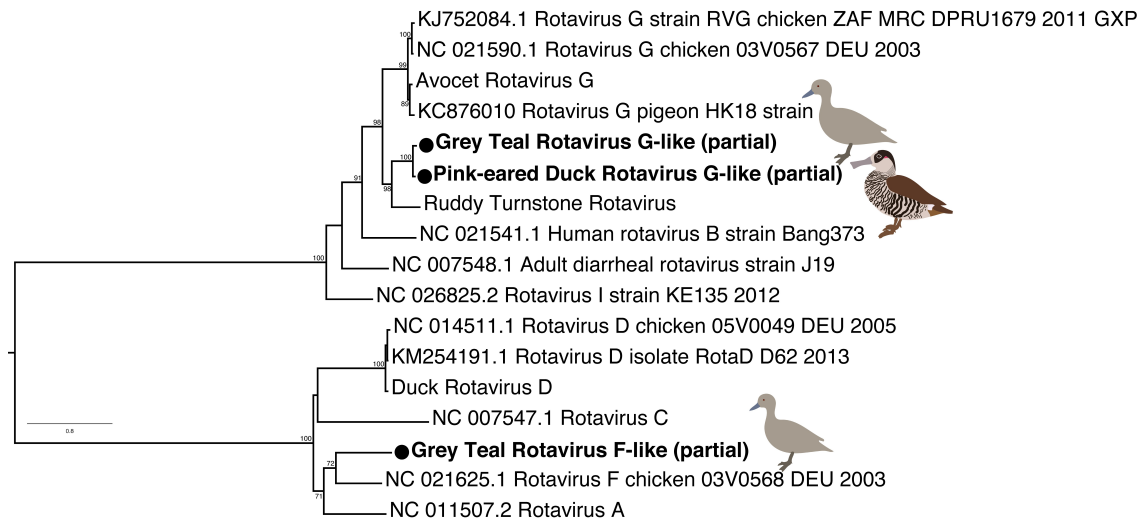

**Figure S7. Phylogenetic tree of the VP1, containing the RdRp, of the rotaviruses.** The sequences generated in this study are indicated by a filled circle and are in bold. The tree is midpoint rooted for clarity only. Bootstrap values >70% are shown for key nodes. The scale bar indicates the number of amino acid substitutions per site



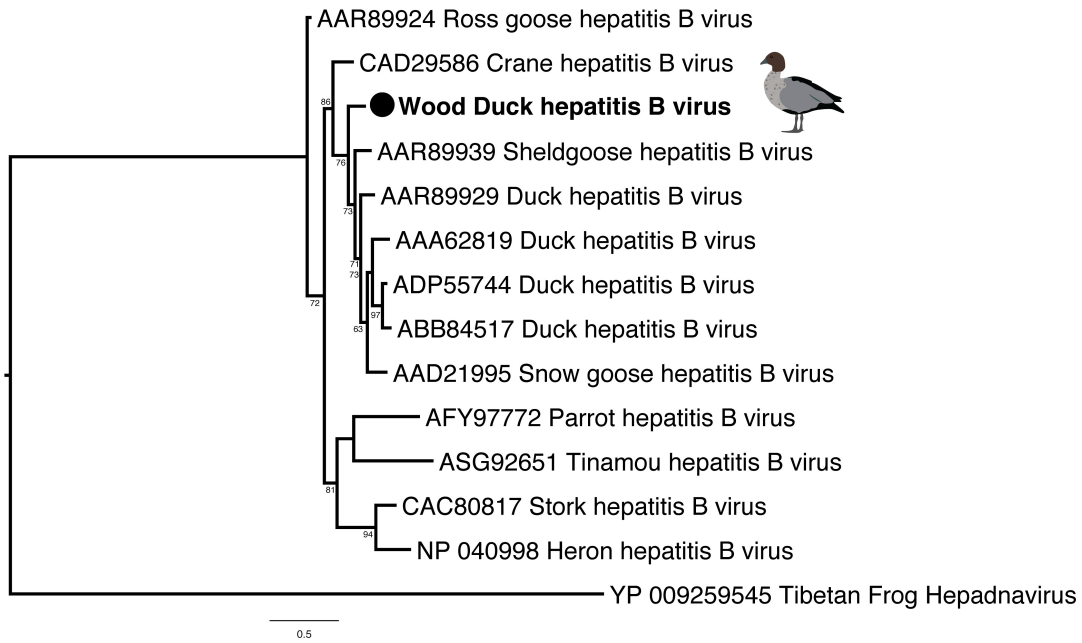

**Figure S8. Phylogenetic tree of the P protein of avian hepatitis B viruses.** The sequence generated in this study are indicated by a filled circle and are in bold. Tibetan Frog Hepadnavirus is set as the outgroup. Bootstrap values >70% are shown for key nodes. The scale bar indicates the number of amino acid substitutions per site

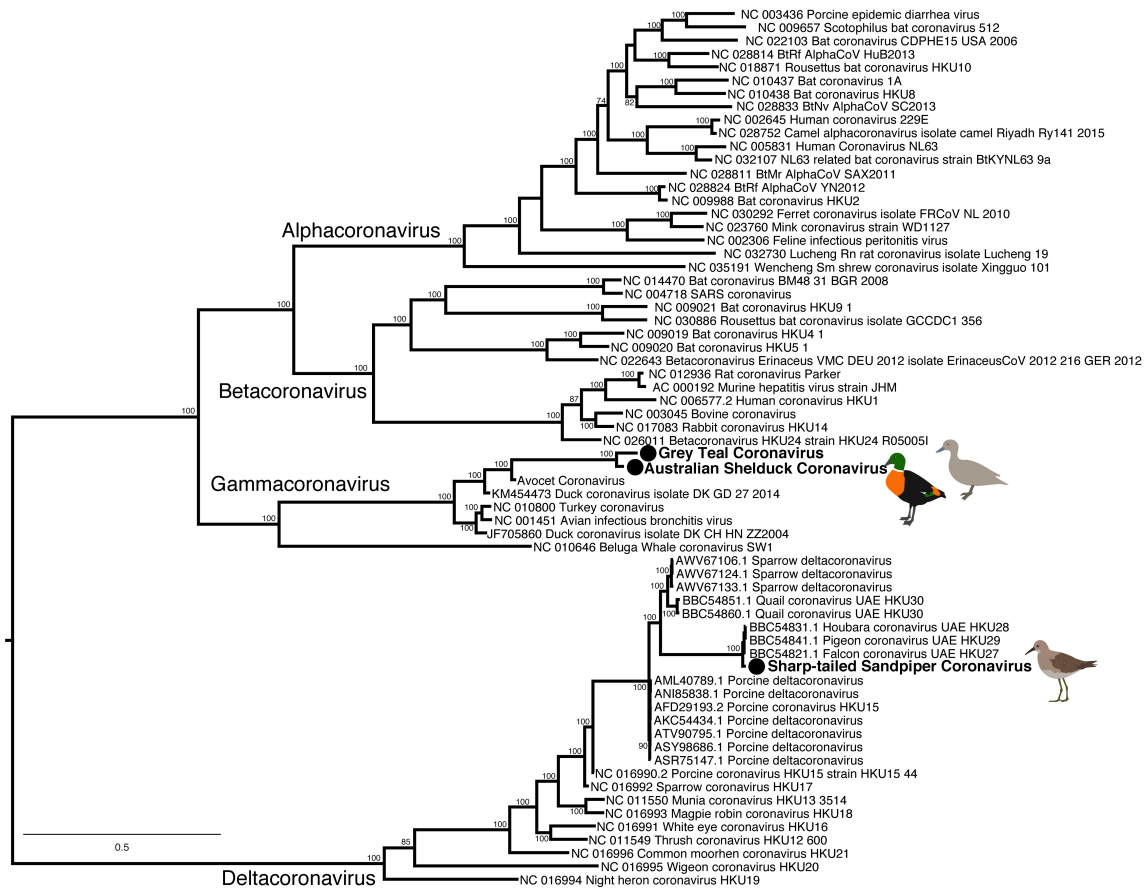

**Figure S9. Phylogenetic tree of the ORF1ab, containing the RdRp, of the *Coronaviridae*.**

The sequences generated in this study are indicated by a filled circle and are in bold. The tree is midpoint rooted for clarity only. Bootstrap values >70% are shown for key nodes. The scale bar indicates the number of amino acid substitutions per site. Partial gammacoronavirus and deltacoronavirus phylogenies, allowing for the inclusion of numerous wild bird sequences, are presented in Figure S10 and S11, respectively.

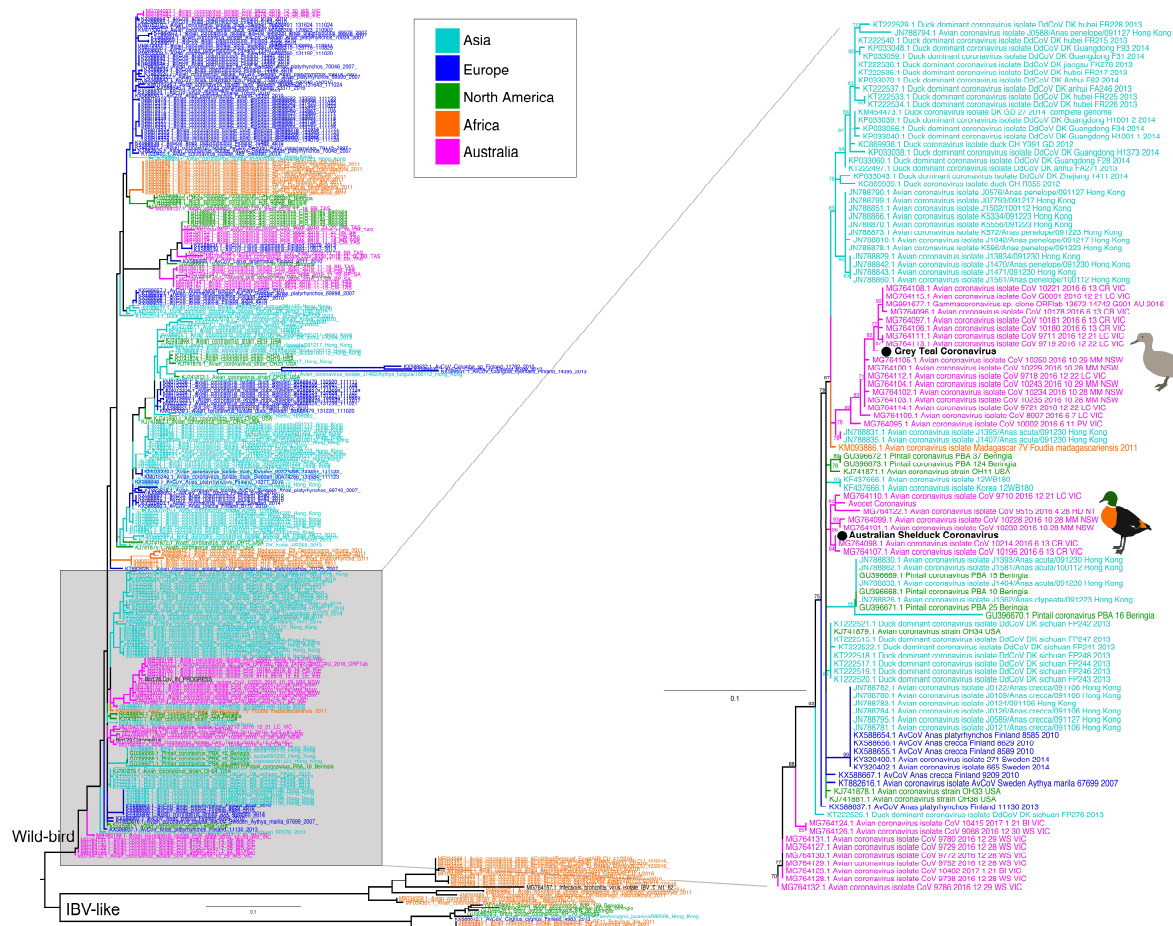

**Figure S10. Phylogeny of the partial RdRp of gammacoronaviruses.** The tree shows all current wild bird sequences, the majority of which form a clade (“Wild-bird”) that is a sister-group to the Infectious Bronchitis virus (IBV) and Infectious-bronchitis virus-like viruses. The clade comprising IBV and IBV-like viruses was set as the outgroup. Tips are coloured by geographic origin. The subsection of the tree within the grey box has been expanded to allow for legibility of tip names, and the viruses identified in this study are in bold and denoted by a filled circle. Bootstrap values >70% are shown for key nodes. The scale bar represents the number of nucleotide substitutions per site.

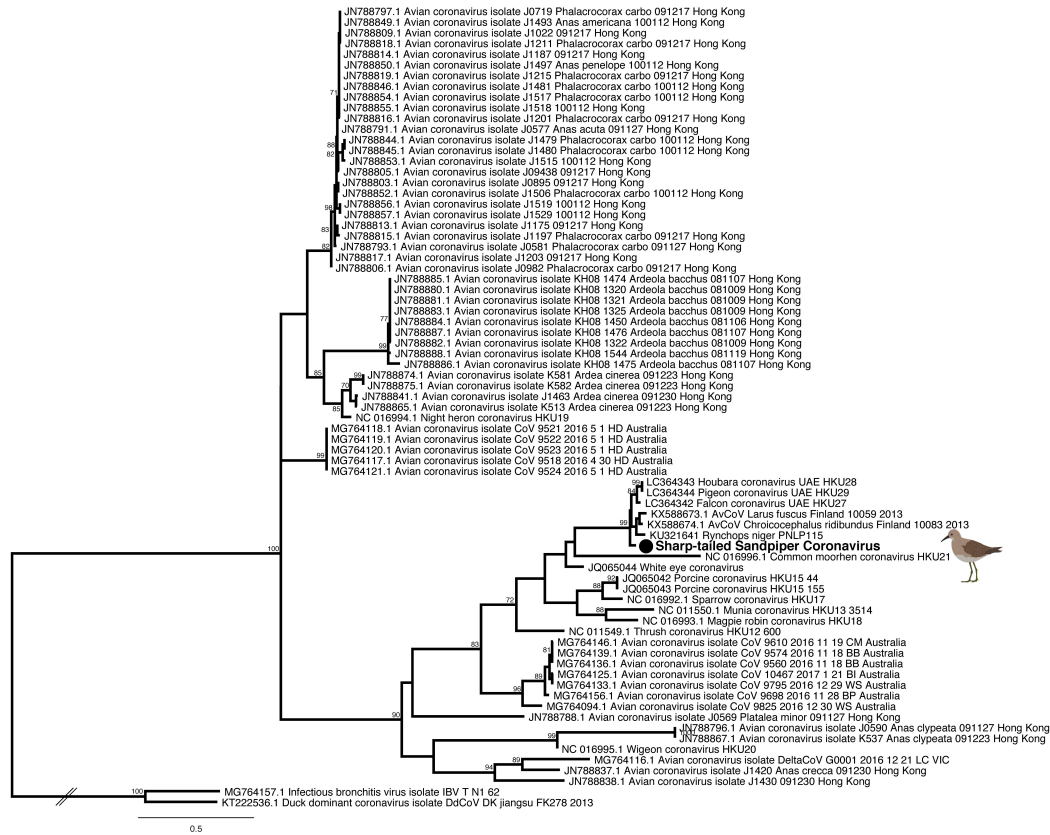

**Figure S11. Phylogeny of the partial RdRp of deltacoronaviruses.** Two representative gammacoronaviruses are set as the outgroup. Viruses identified in this study are in bold and denoted by a filled circle. Bootstrap values >70% are shown for key nodes. The scale bar represents the number of nucleotide substitutions per site.

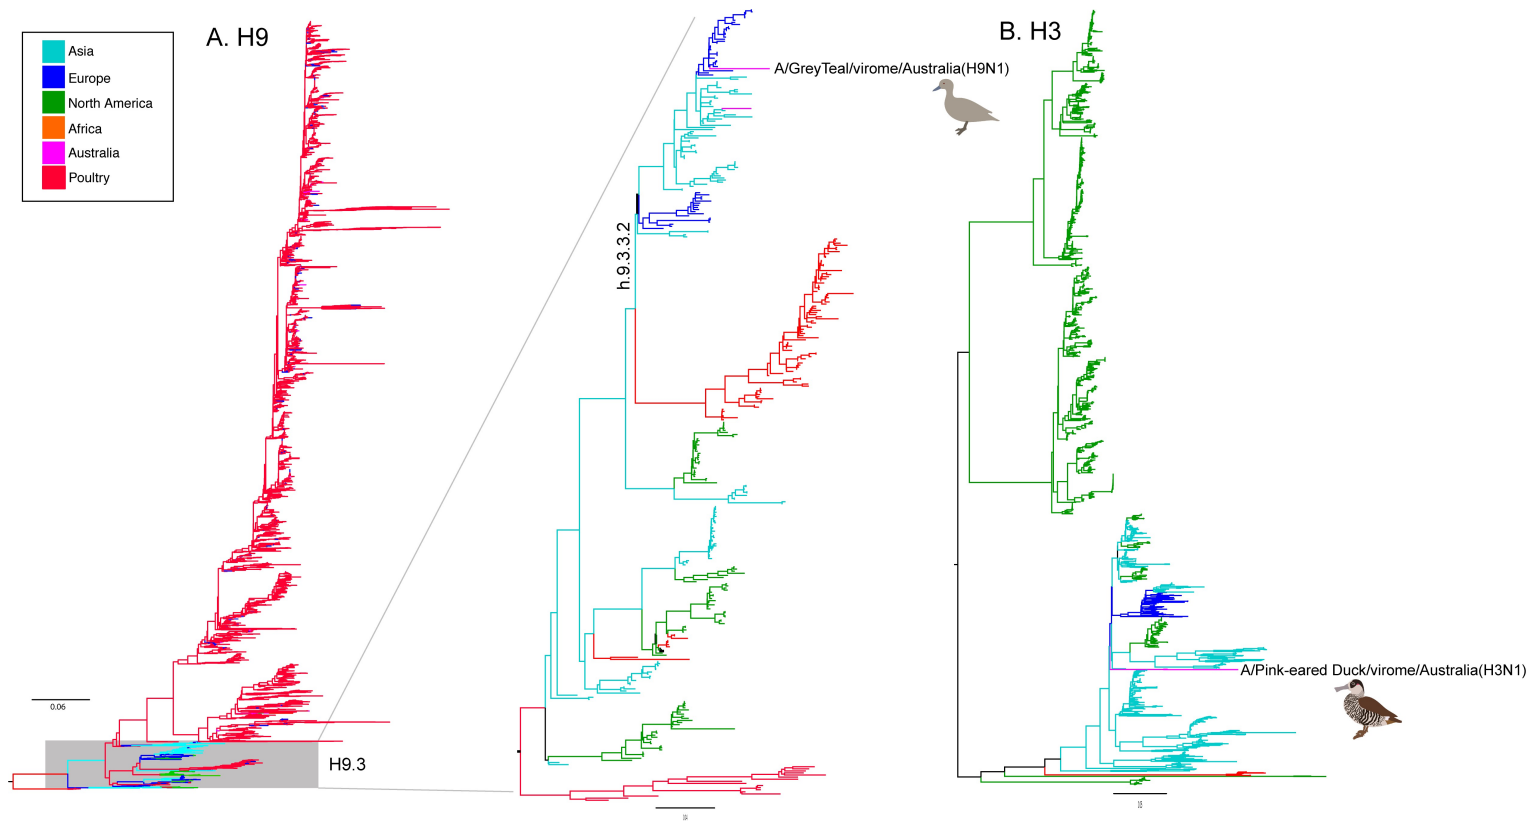

**Figure S12. Phylogenies of the HA genes of H9 and H3 influenza A viruses containing all wild bird sequences.** (A) The H9.3 clade is identified by a grey box on the global H9 phylogeny, in which clade H9.1 is set as the outgroup. Clade H9.3 has been expanded, and is rooted by more distantly related H9 sequences; subclade H9.3.3.2 is further identified. Representative viruses in this clade are those identified by Jiang et al. (2012). (B) The H3 phylogeny was mid-point rooted, corresponding to a major biogeographic division between Eurasia and the Americas. The phylogenetic position of the viruses sequenced in this study by their designations: A/Grey Teal/virome/Australia/2016(H9N1) and A/Pink-eared Duck/virome/Australia/2016(H3N1), respectively. Bootstrap values >70% are shown for key nodes. The scale bar indicates number of nucleotide substitutions per site.

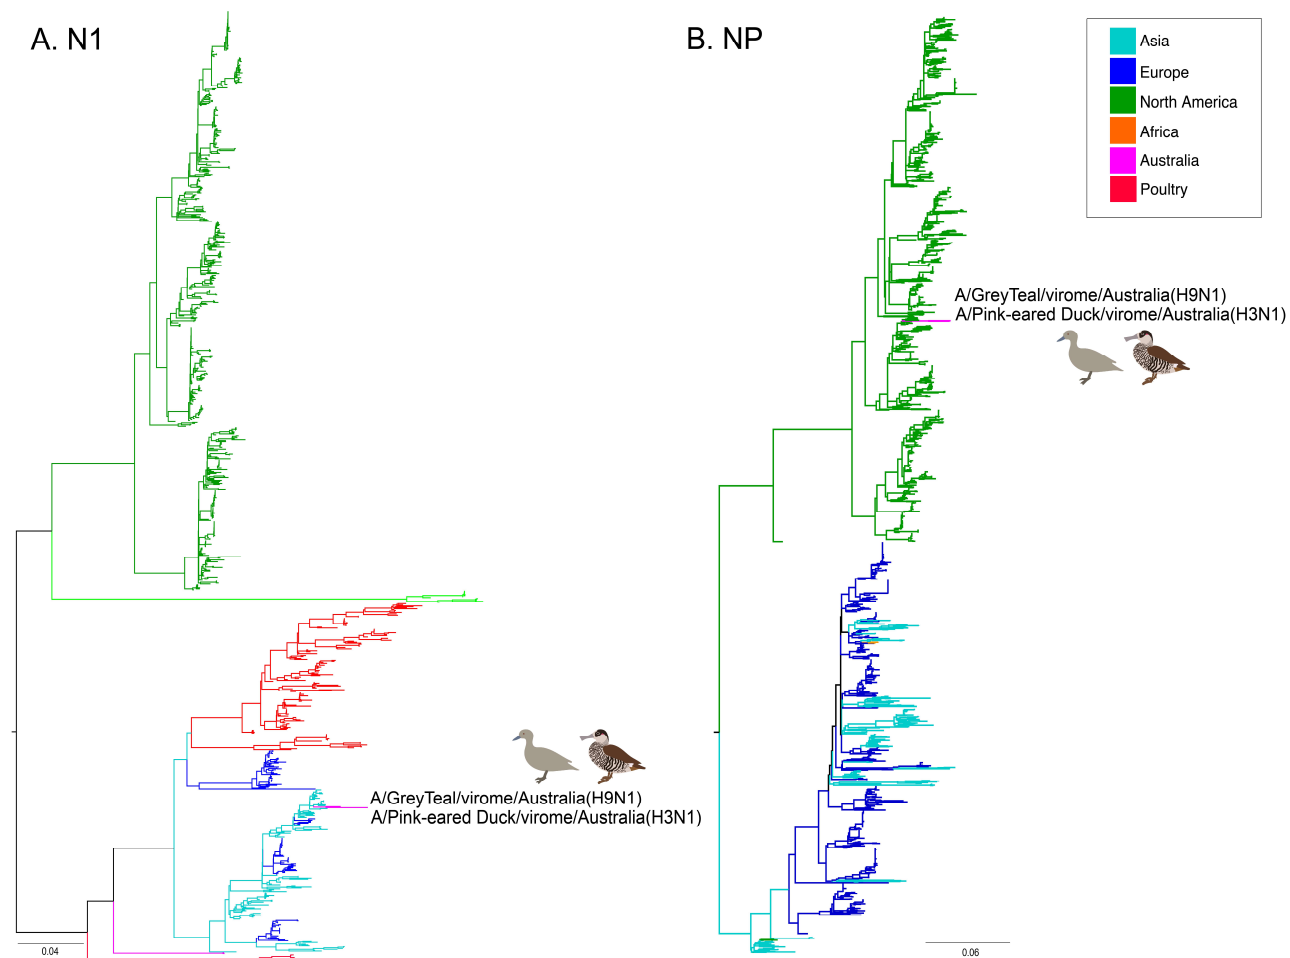

**Figure S13. Phylogenies of the NA and NP genes of influenza A viruses, containing all wild bird sequences.** Trees were midpoint rooted, corresponding to a major biogeographic division between Eurasia and the Americas. The phylogenetic position of the viruses sequenced in this study by their designations: A/Grey Teal/virome/Australia/2016(H9N1) and A/Pink-eared Duck/virome/Australia/2016(H3N1) respectively. Bootstrap values >70% are shown for key nodes. The scale bar indicates number of nucleotide substitutions per site

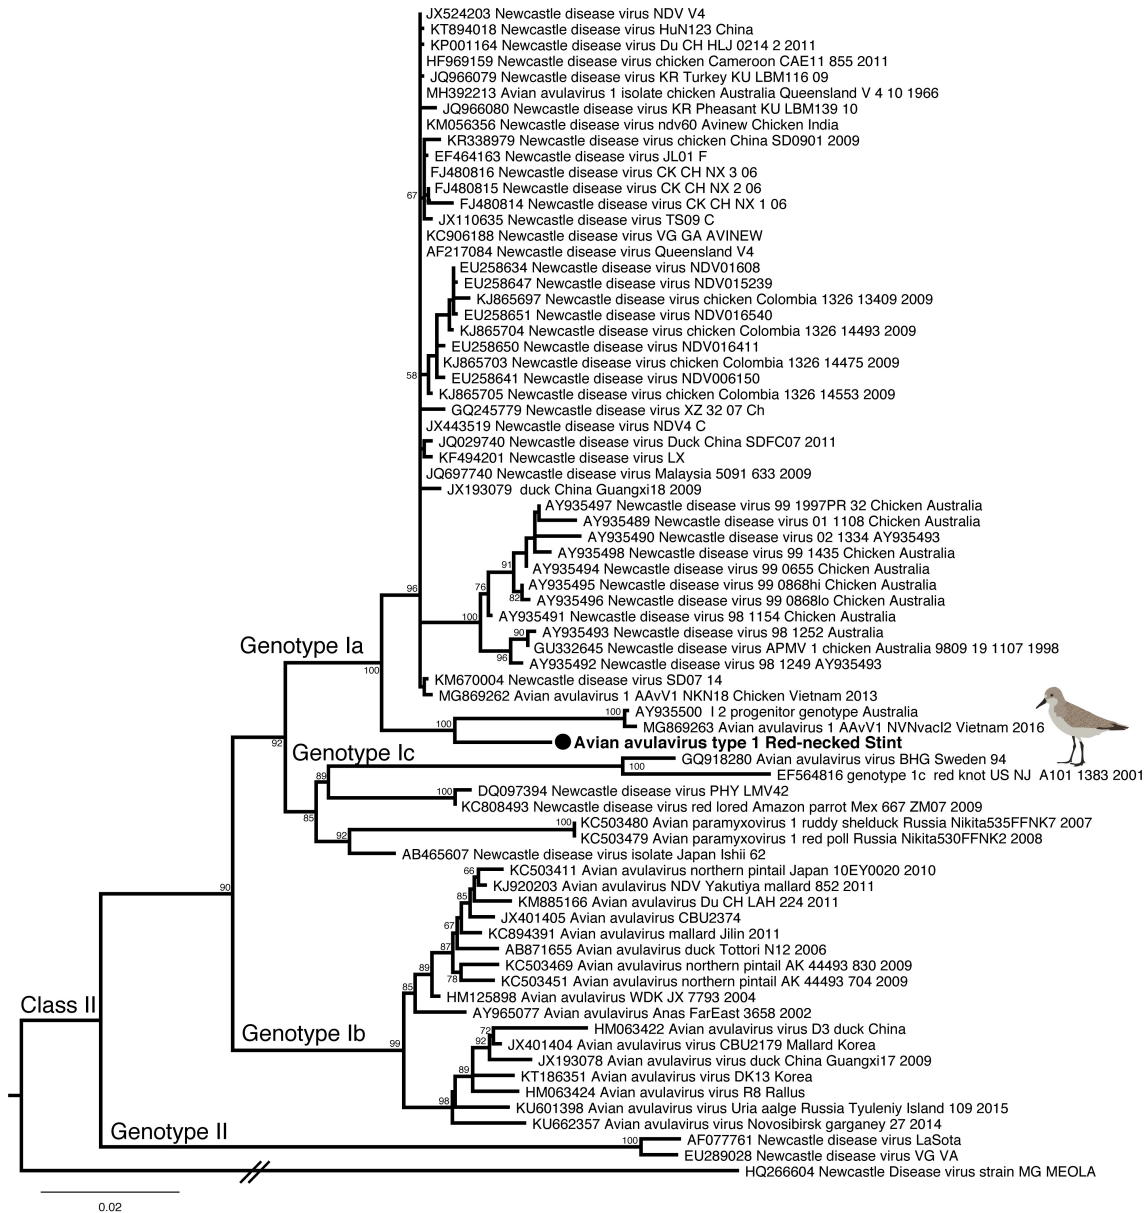

**Figure S14. Phylogeny of the F gene of avian avulavirus Type 1 Class II Genotype 1.** A Class I virus, strain MG MEOLA was set as the outgroup. The virus identified in this study is in bold and denoted by a filled circle in Genotype Ia, with a low pathogenic cleavage site: GRQGR\*L. Bootstrap values >70% are shown for key nodes. The scale bar represents the number of nucleotide substitutions per site.

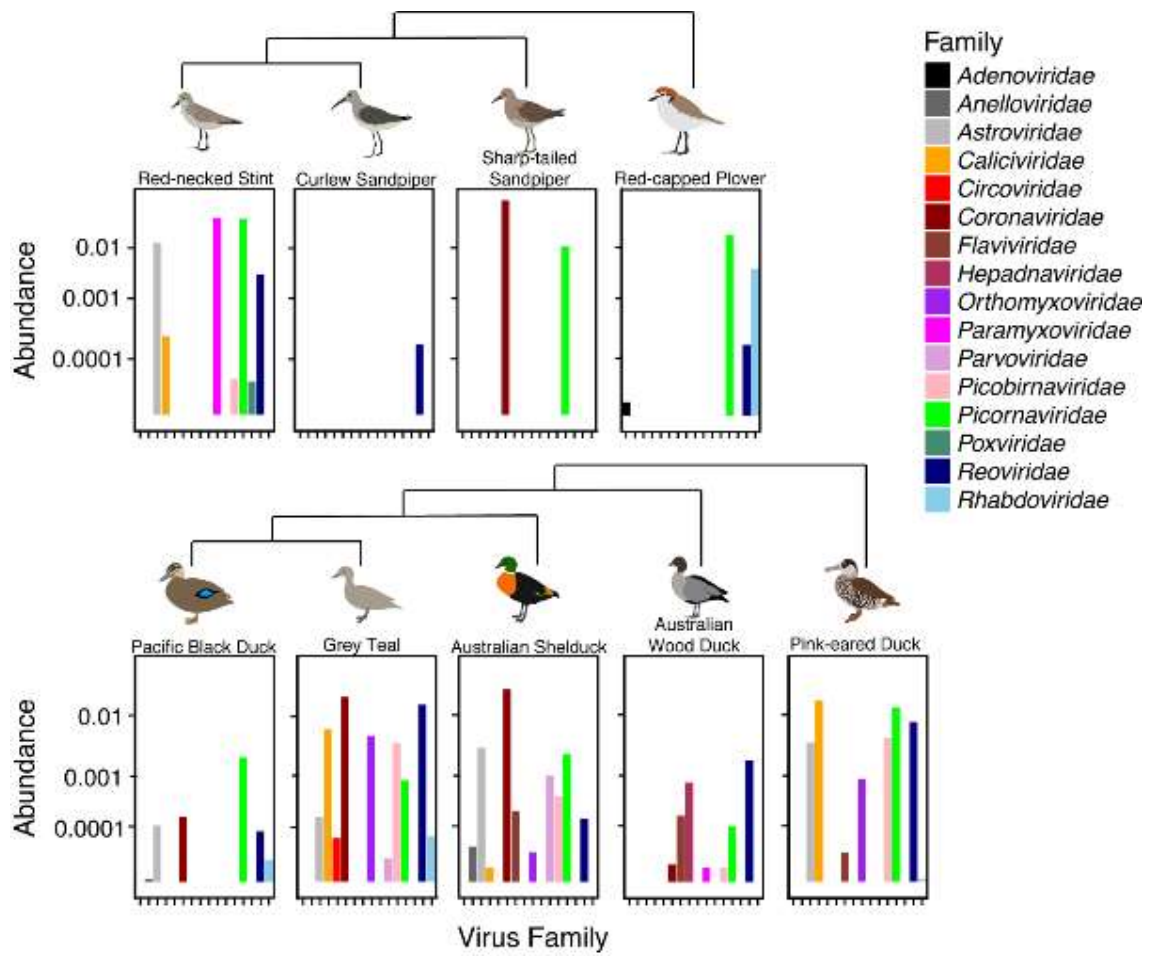

**Figure S15. Abundance of avian viral families identified in each library.** Libraries are arranged taxonomically, with cladograms illustrating species relationships within the Charadriiformes and Anseriiformes. Taxonomic identification presented is that of the top blastx hit of all avian viral contigs. Alpha diversity metrics are presented in Figure S16.



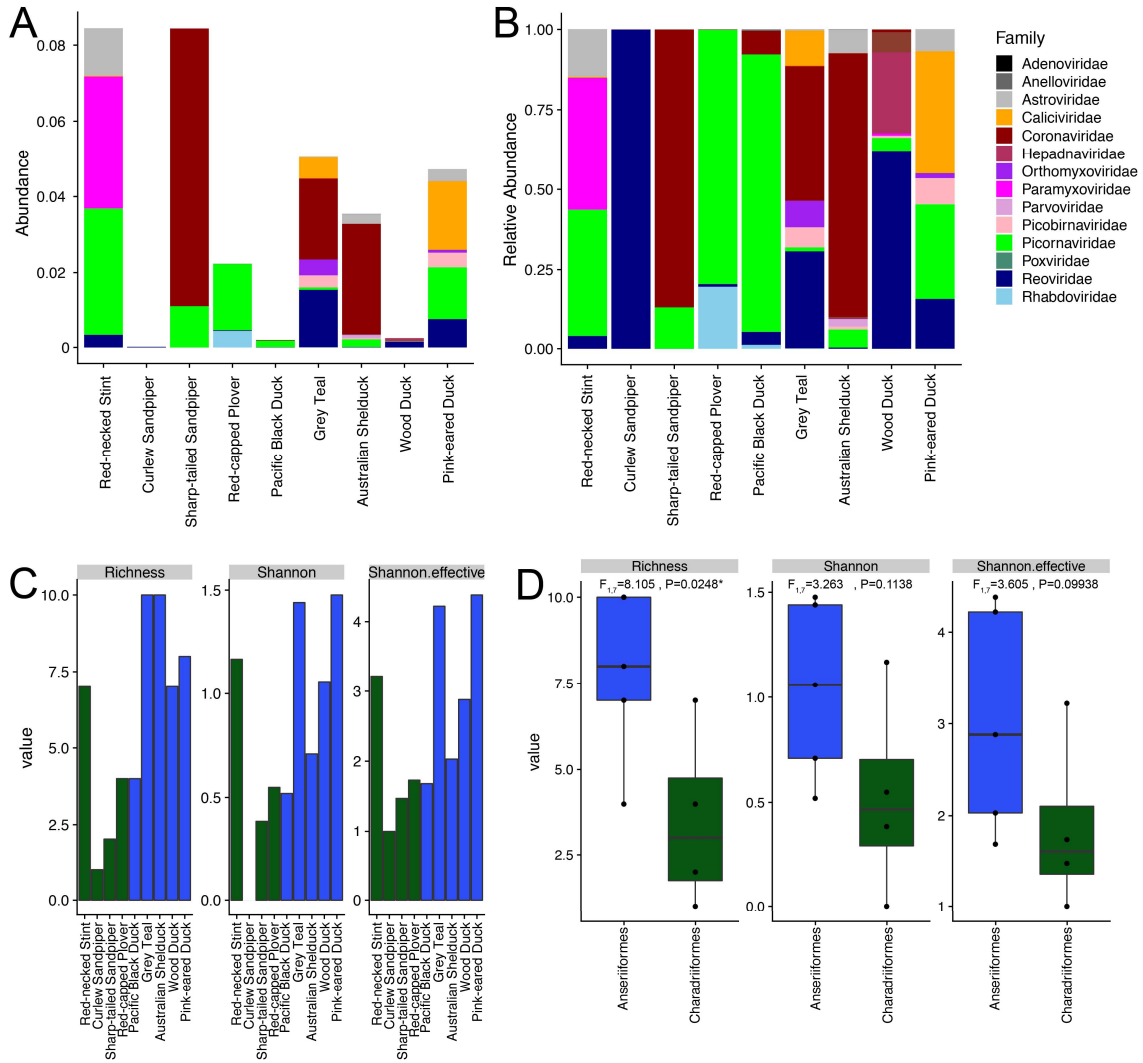

**Figure S16. Alpha diversity of avian viral families identified in each library.** (A) Abundance of viral families in each library and (B) relative abundance of viral families in each library. (C) Alpha diversity metrics calculated for each library and (D) for avian order. Differences in alpha diversity between Anseriiformes and Charadriiformes were calculated using a linear model following a box-cox transformation. In panels C and D samples from Charadriiformes are in green and from Anseriiformes in blue. Panel A is reproduced in Fig 1.

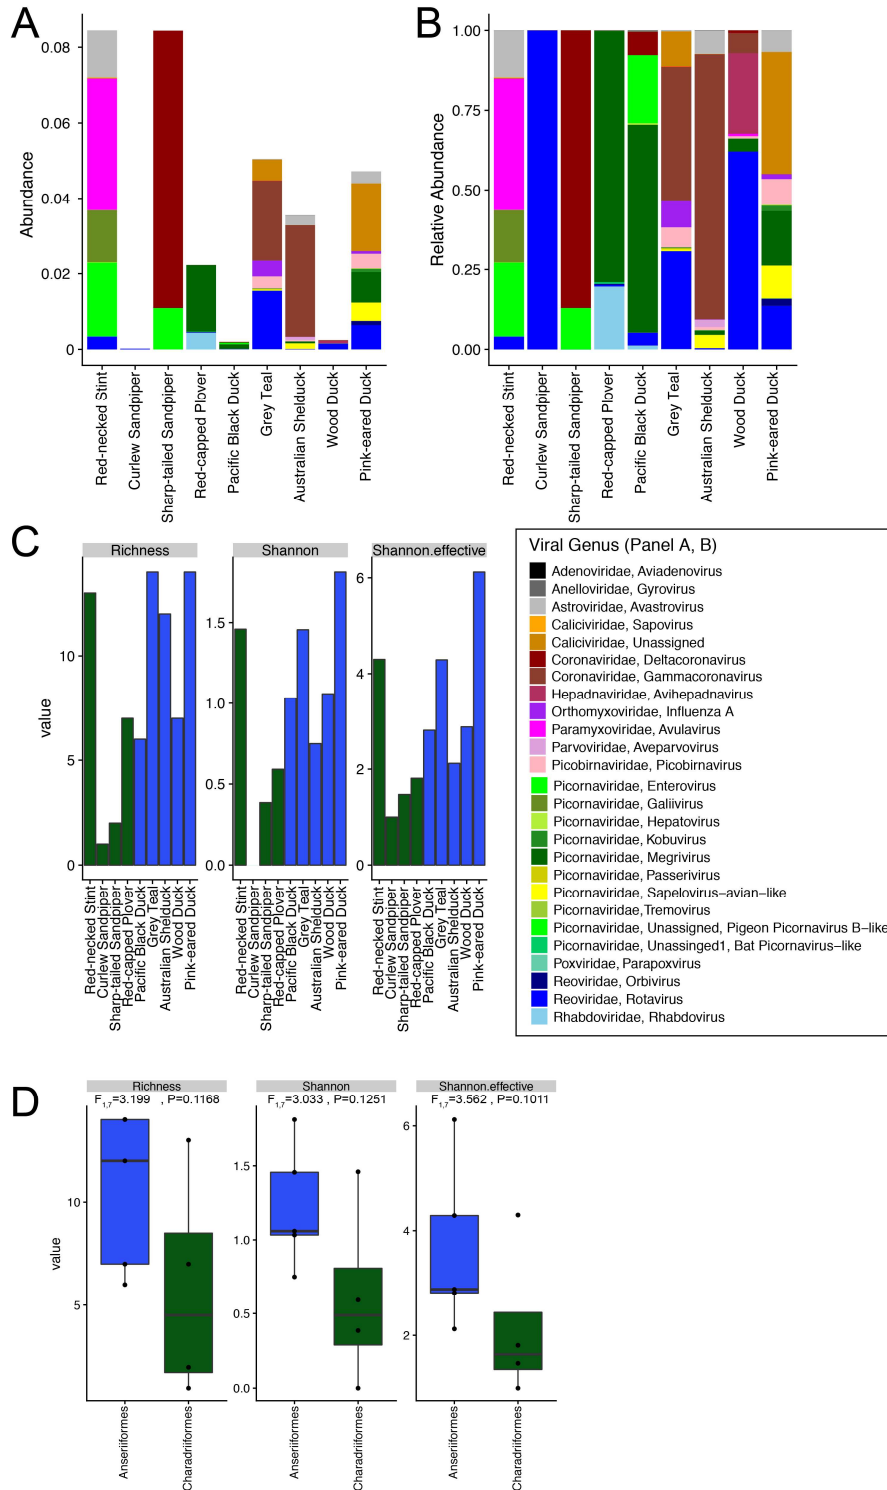

**Figure S17. Alpha diversity of avian viral genera identified in each library.** (A) Abundance of viral genera in each library and (B) relative abundance of viral genera in each library. (C) Alpha diversity metrics calculated for each library and (D) for avian order. Differences in alpha diversity between Anseriiformes and Charadriiformes were calculated using a linear model following a box-cox transformation. In panels C and D samples from Charadriiformes are in green and from Anseriiformes in blue.

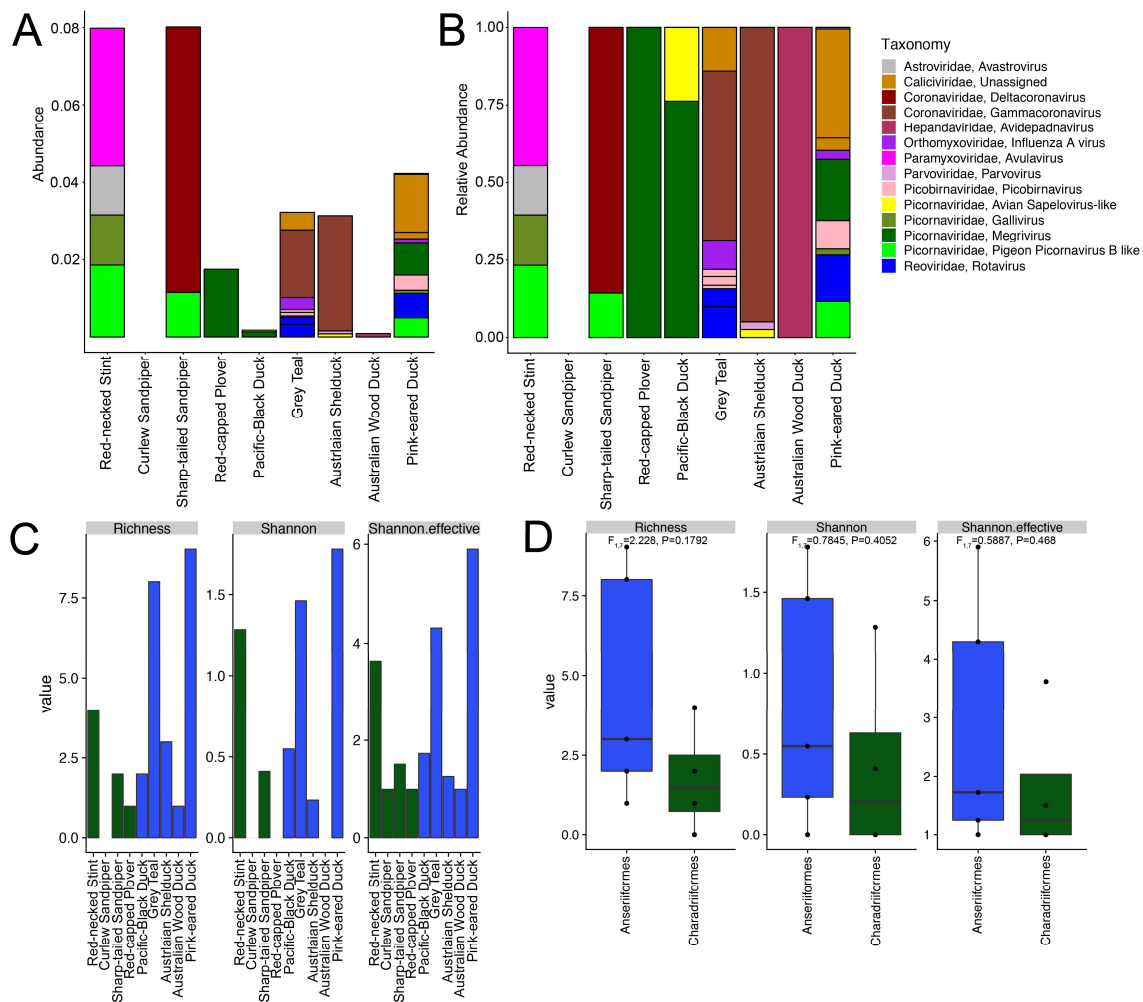

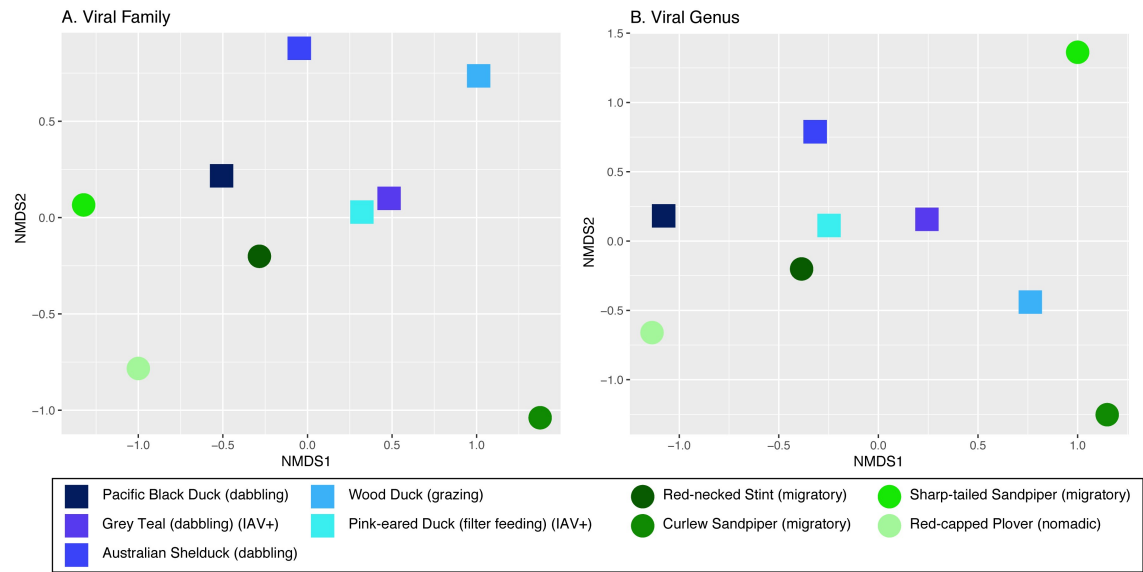

**Figure S19. Non-metric multidimensional scaling (NMDS) plot applying the bray curtis dissimilarity matrix for viral abundance and diversity.** Panel A uses the viral level library composition and B uses viral genera level library composition. Anseriform libraries are in shades of blue, and charadriiformes in shades of green.

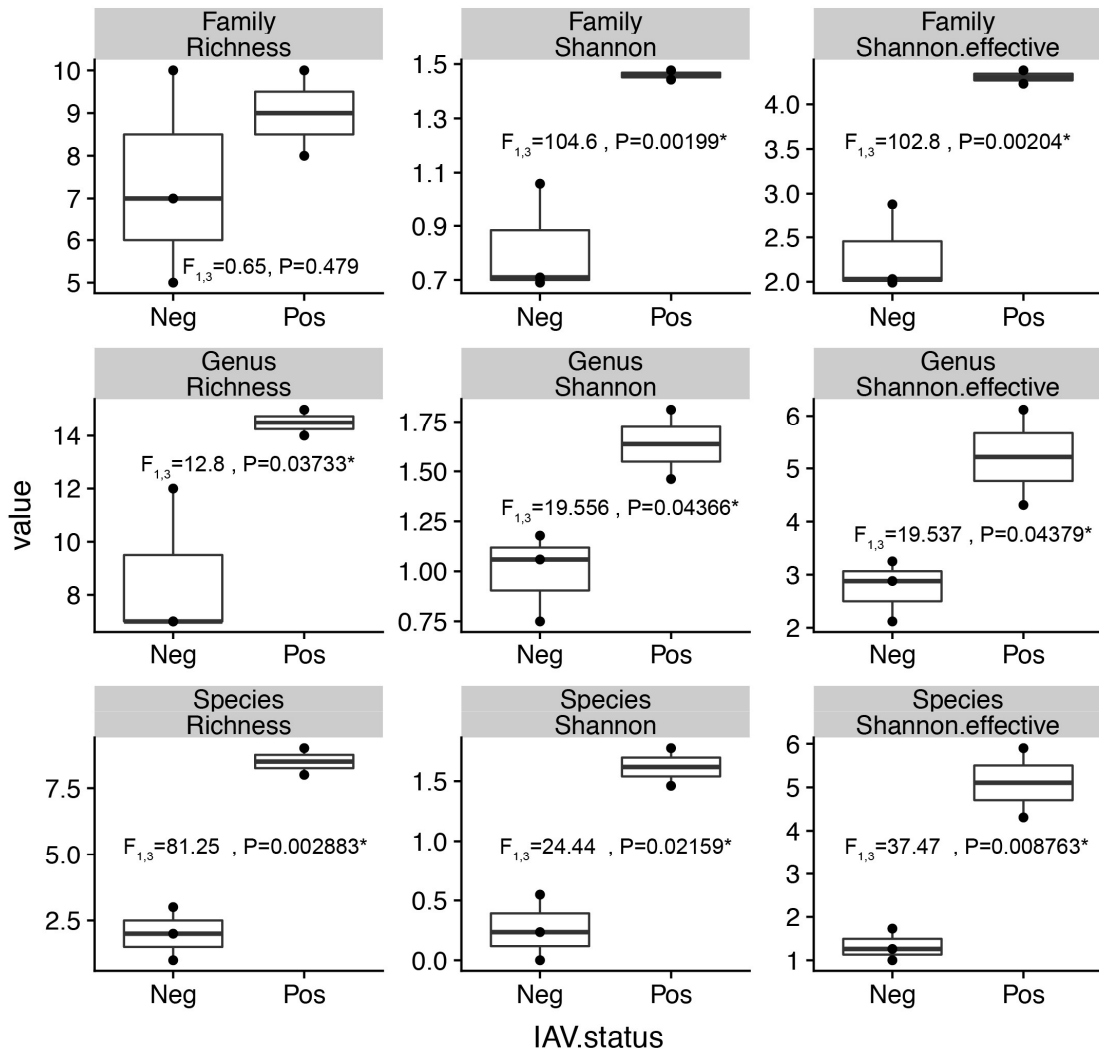

**Figure S20. Effect of IAV on Alpha Diversity of Anseriiform viromes.** There is a clear trend whereby the median and inter quartile range of alpha diversity is higher in Anseriiform libraries that are positive for influenza A virus as compared to those that are negative. The difference in alpha diversity given IAV status was tested using a linear model following a box-cox transformation.

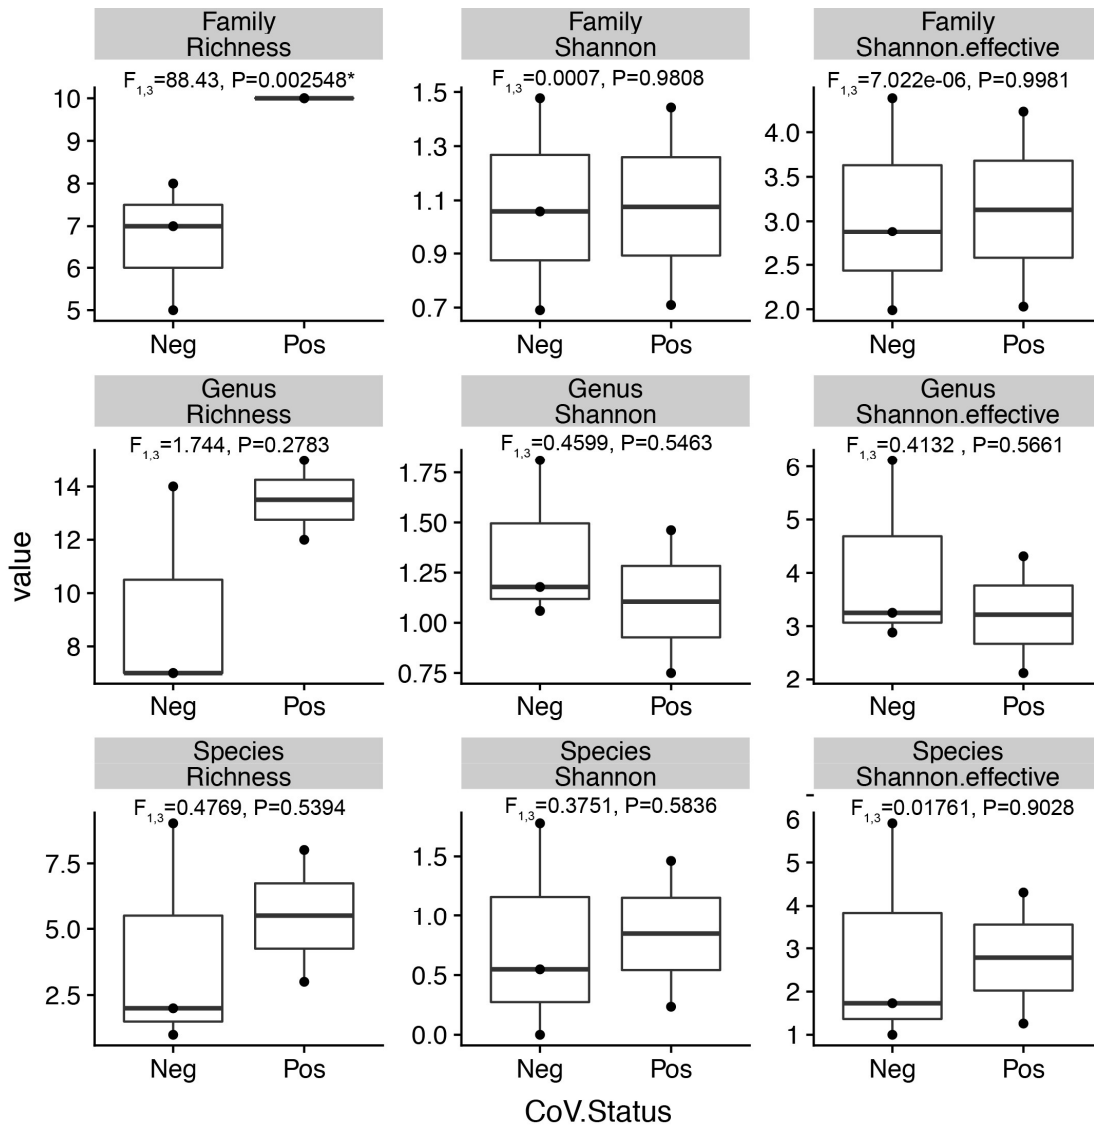

**Figure S21. Effect of coronavirus on alpha diversity of Anseriiform viromes.** The difference in alpha diversity given CoV status was tested using a linear model following a box-cox transformation.

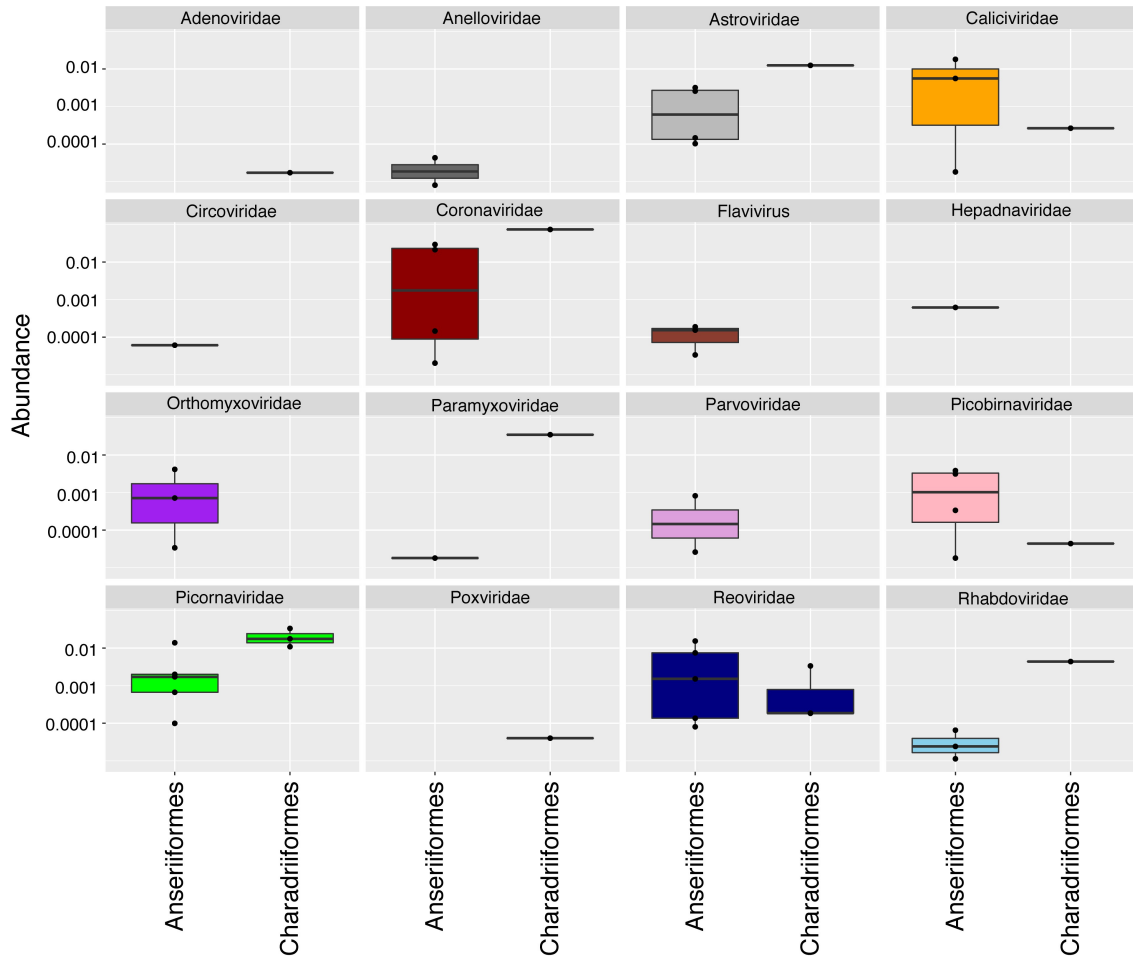

**Figure S22. Differential abundance of viral families in libraries from Anseriiformes and Charadriiformes.**

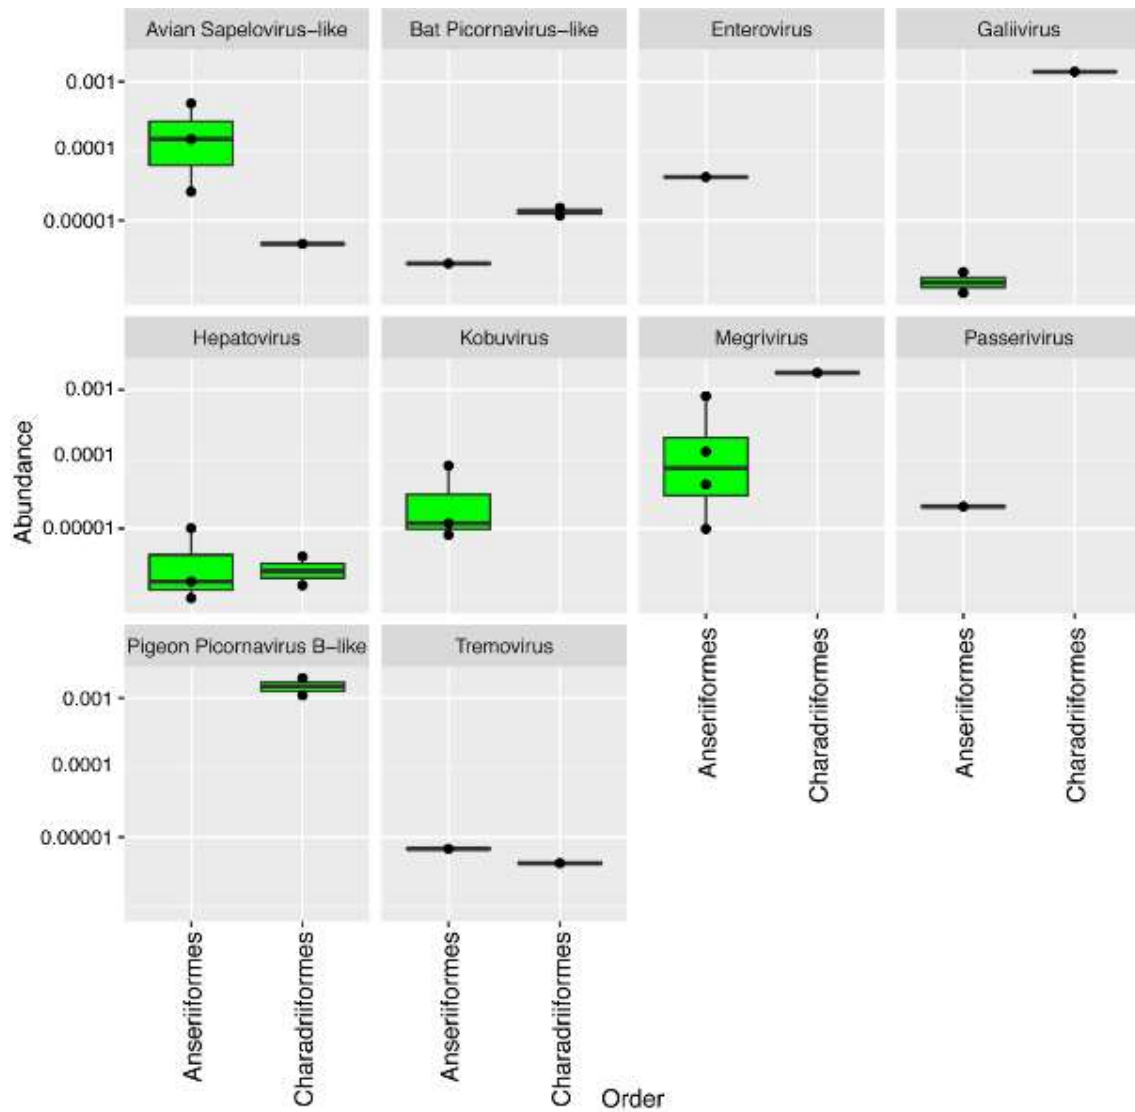

**Figure S23. Differential abundance of viral genera in the family *Picornaviridae* in libraries from Anseriiformes and Charadriiformes.**



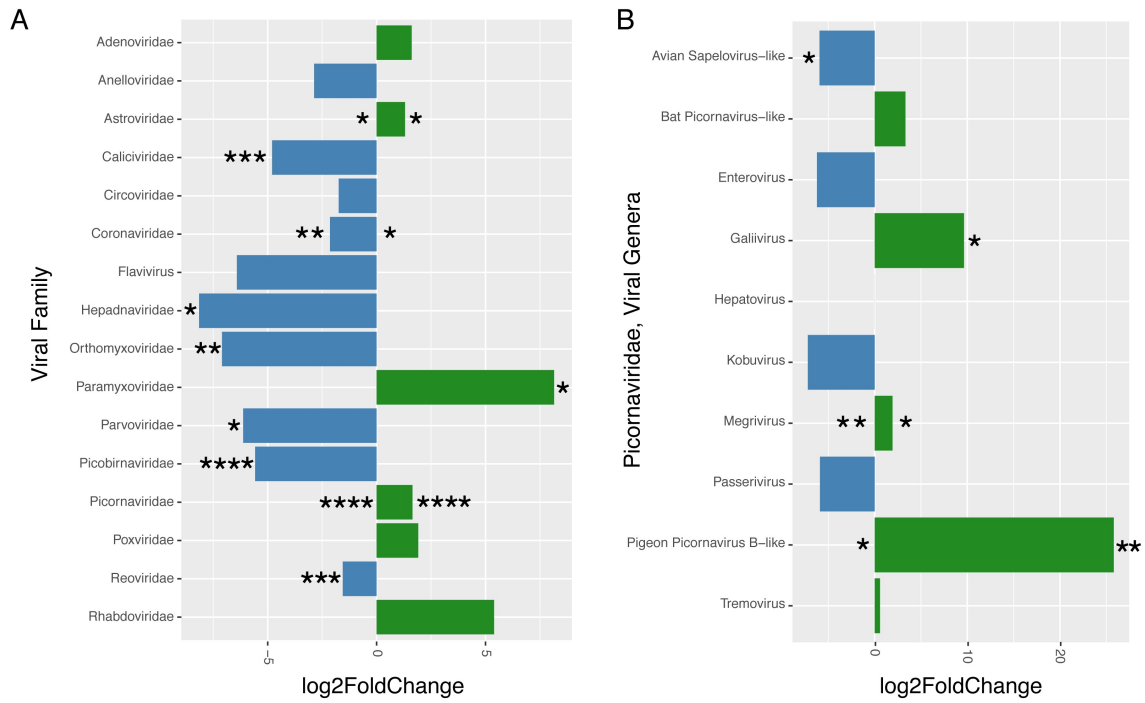

**Figure S24. Differential abundance (log 2 fold change) of viruses.** (A) Viral families and (B) viral genera in the family *Picornaviridae* in libraries from Anseriiformes and Charadriiformes. Viral families and genera that have a higher abundance in Charadriiformes are coloured in green, and Anseriiformes are coloured in blue. Asterisks indicate the number of characterized viruses from either Anseriiformes or Charadriiformes. Differential abundance is plotted in Figure S12 and S13.

Host Phylogeny, CytB

Virome Composition, Viral Genus

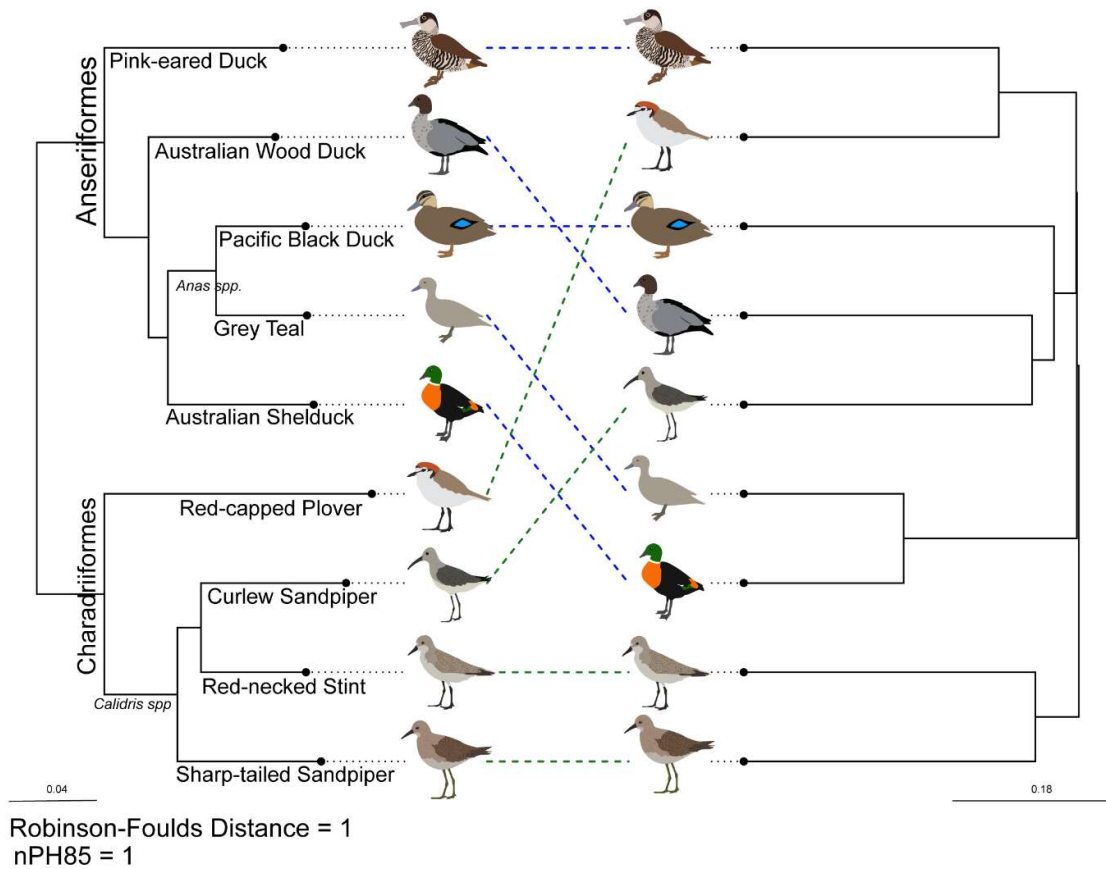

**Figure S25. Co-phylogeny demonstrating a discordance between host phylogenetic relationships and virome composition.** The host phylogeny was inferred using the cytochrome B gene. The virome composition phylogram was generated by clustering of the Bray-Curtis dissimilarity matrix. Dotted lines between the two phylograms are either green or blue, representing either a Charadriiform or Anseriform species, respectively. The relationship was tested using two discordance metrics: Robinson-Foulds and nPH85, where 1 is discordance and 0 is agreement.

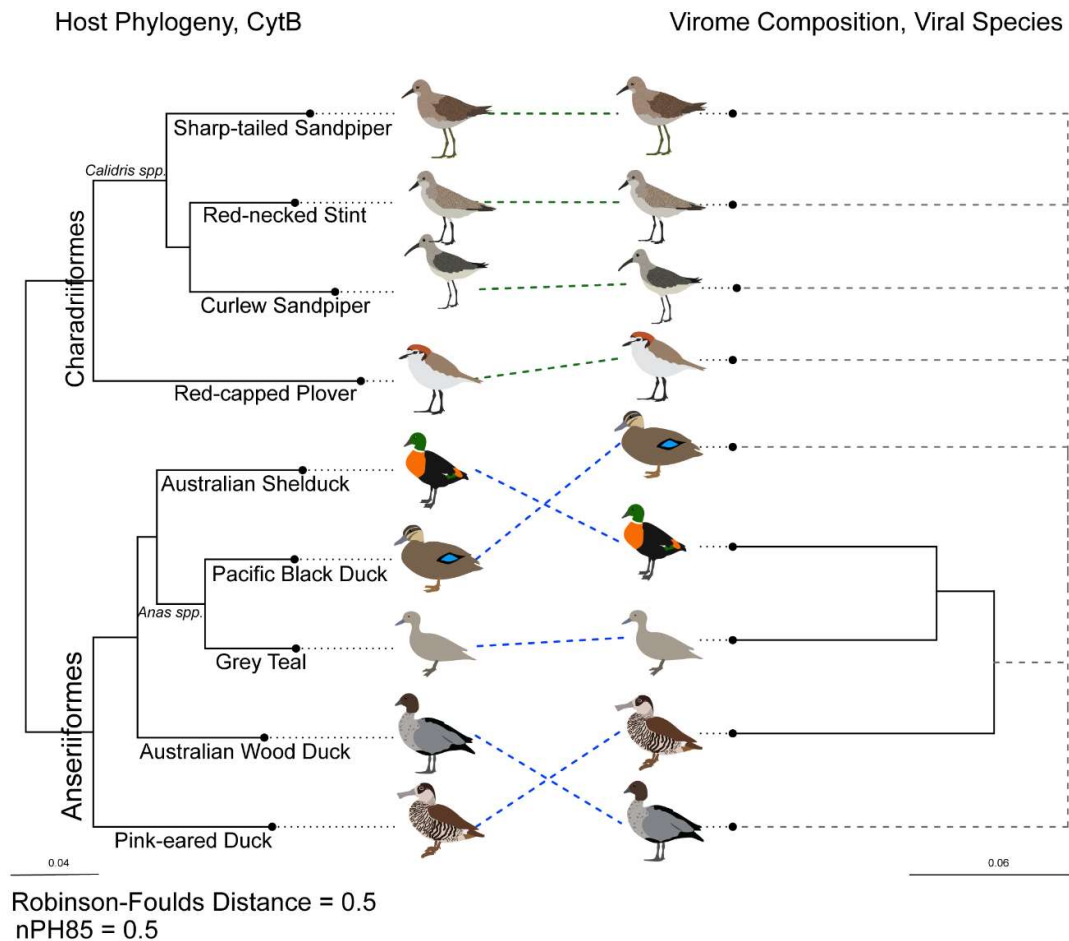

**Figure S26. Co-phylogeny demonstrating the discordance between host phylogenetic relationships and virome composition.** Host phylogenetic relationships were inferred using the cytochrome B gene. The phylogram of virome composition was generated by clustering of Bray-Curtis dissimilarity matrix. The virome composition phylogram comprises black solid lines between Grey Teal, Pink-eared Duck and Australian Shelduck as viral species were shared between these libraries. As no other libraries shared any viral species, the libraries are connected with grey dashed lines on the phylogram. Dotted lines between the two phylograms are either green or blue, representing either a Charadriiform or Anseriform species, respectively. The relationship was tested using two discordance metrics: Robinson-Foulds and nPH85, where 1 is discordance and 0 is agreement.
